# Supplementary material
Source: PubMed Central journal article supplement (PMC9350186)

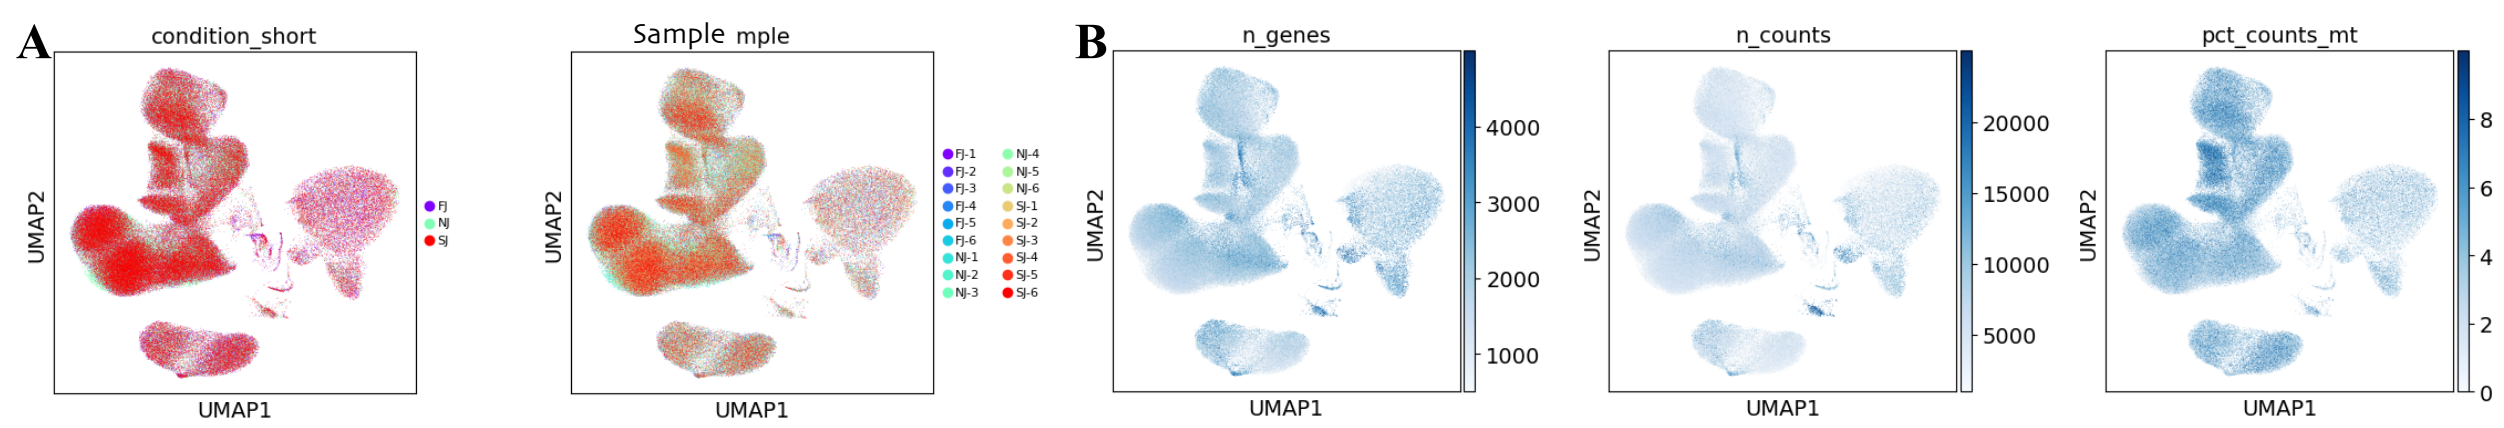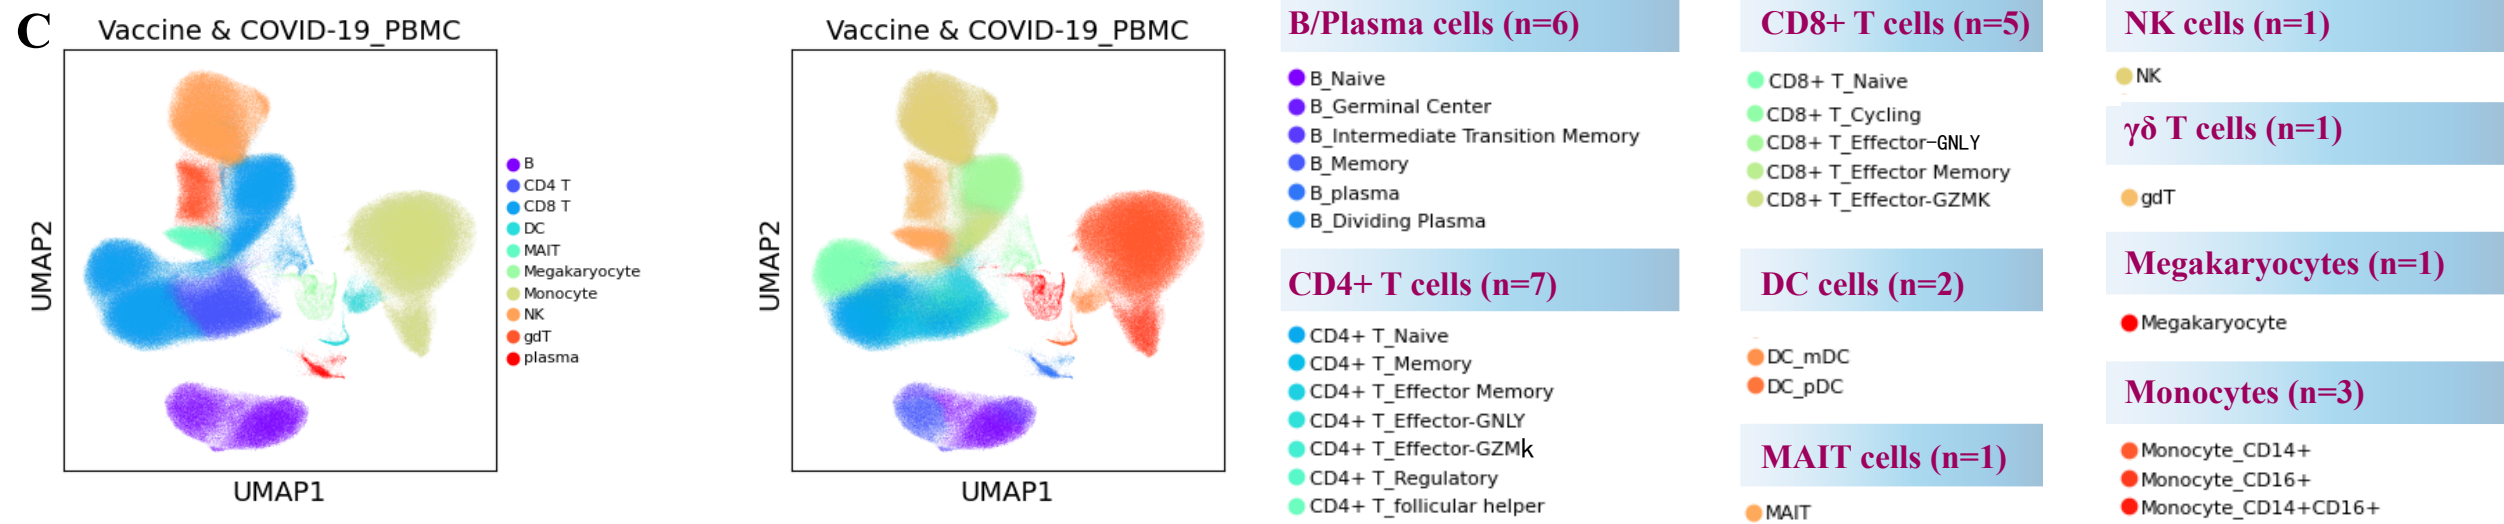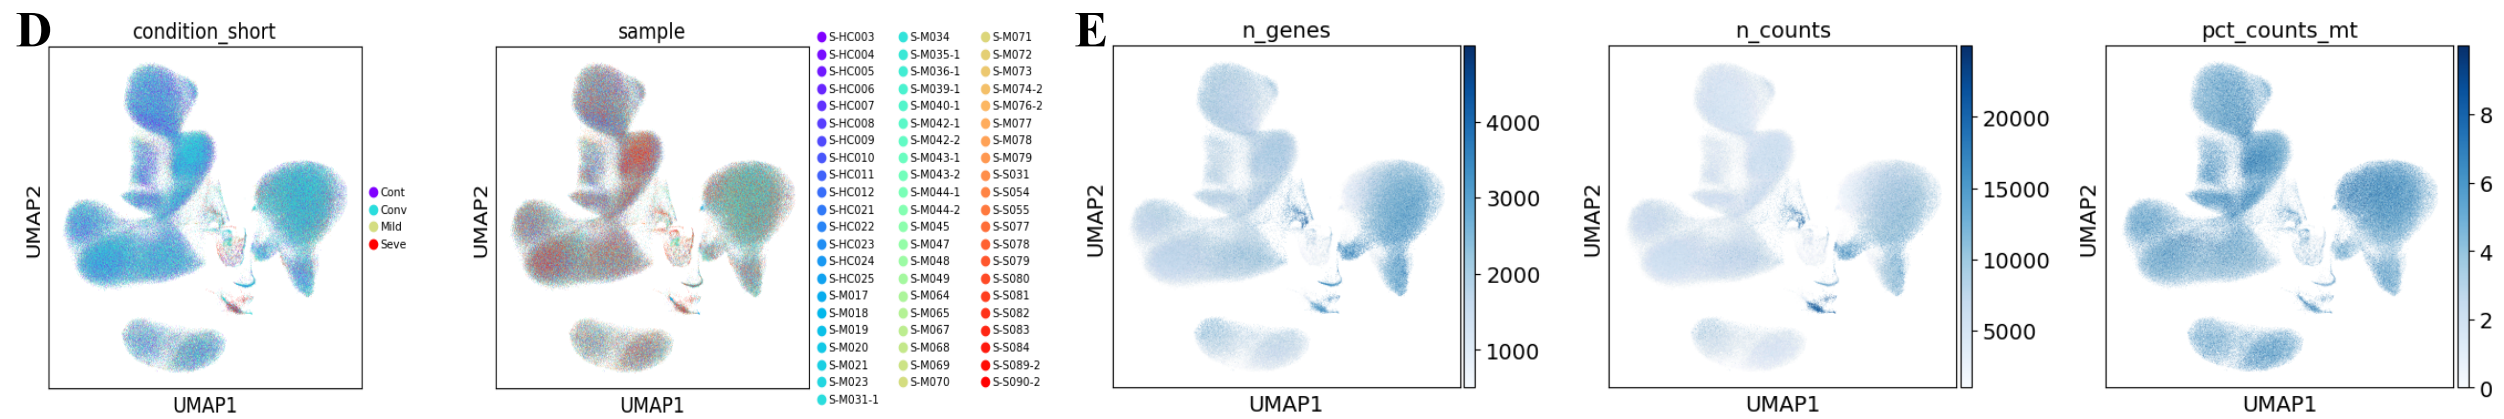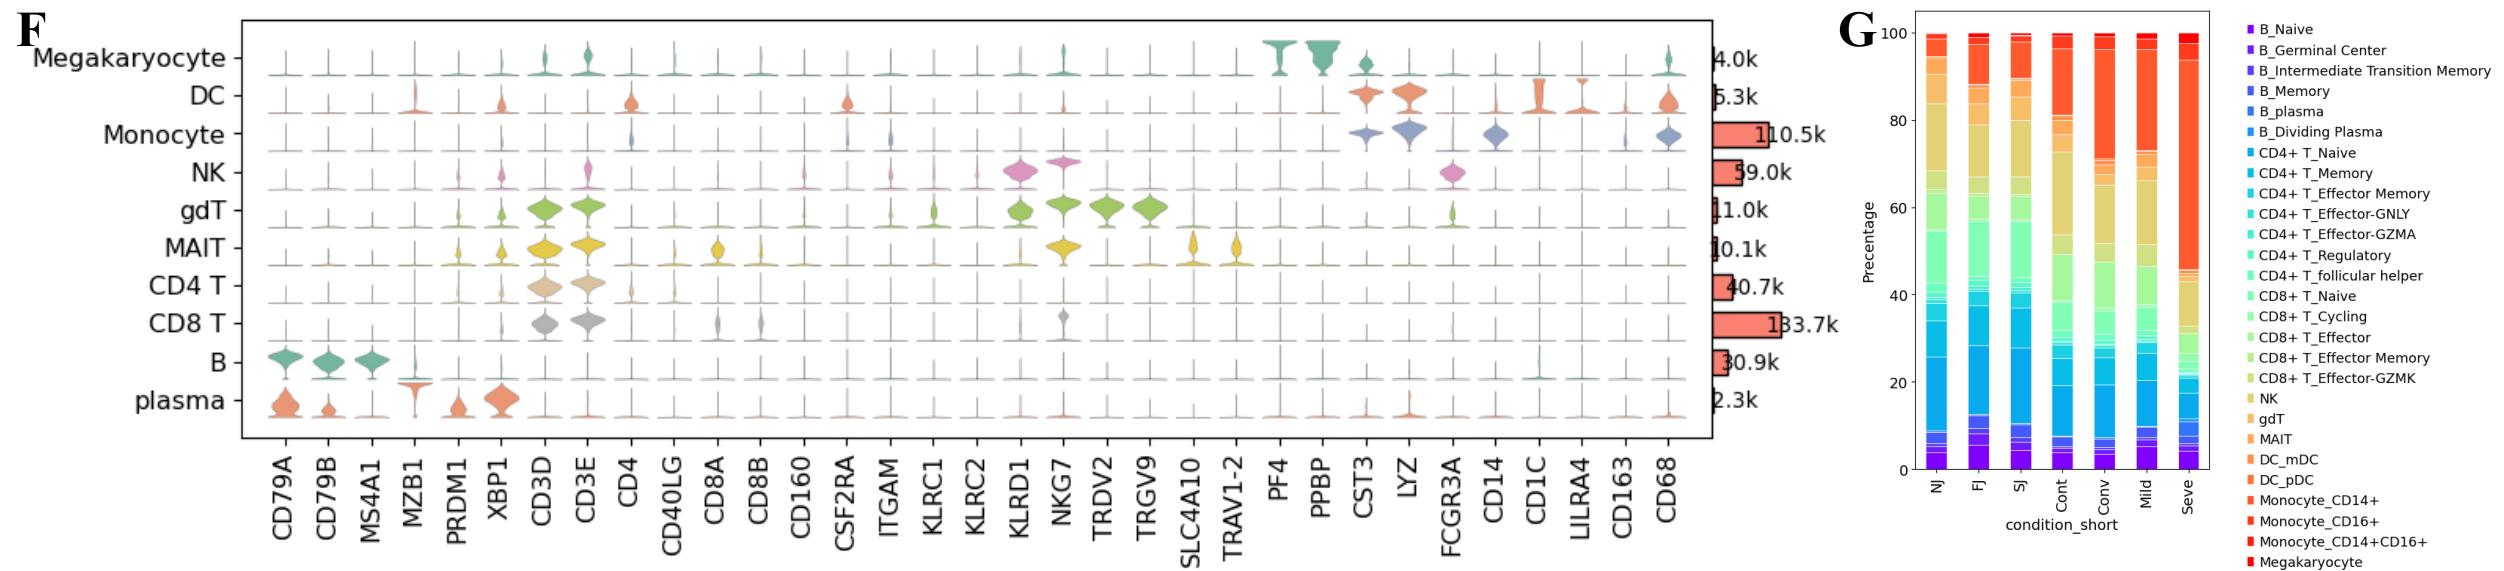

Supplement: JMV-94-5304-s001.pdf [file JMV-94-5304-s001.pdf]

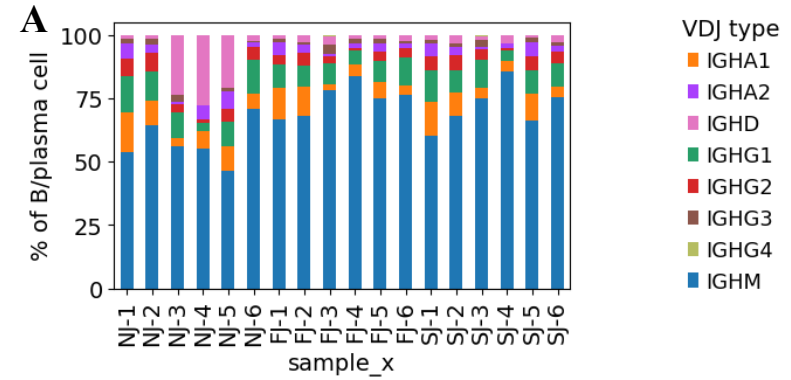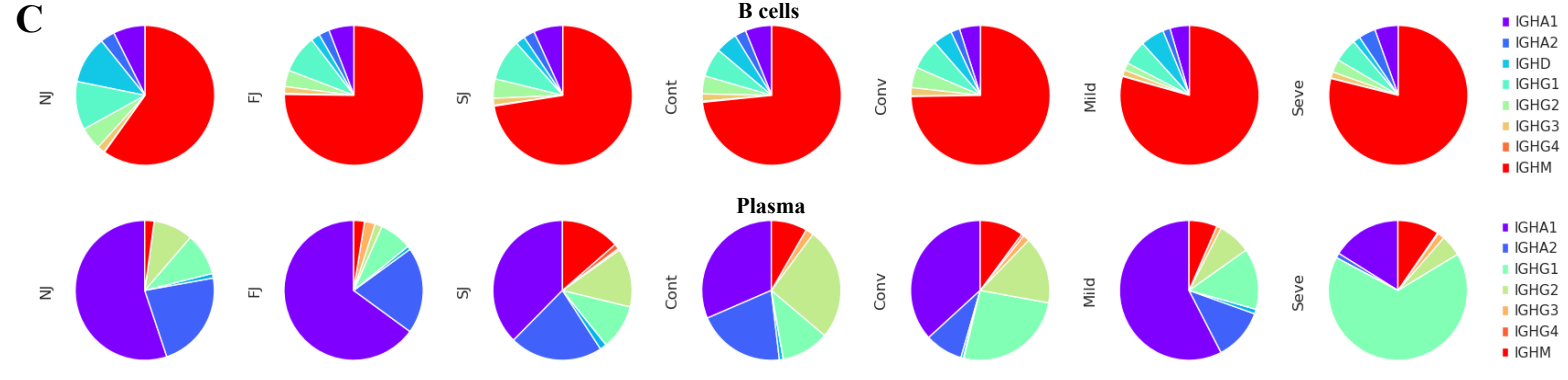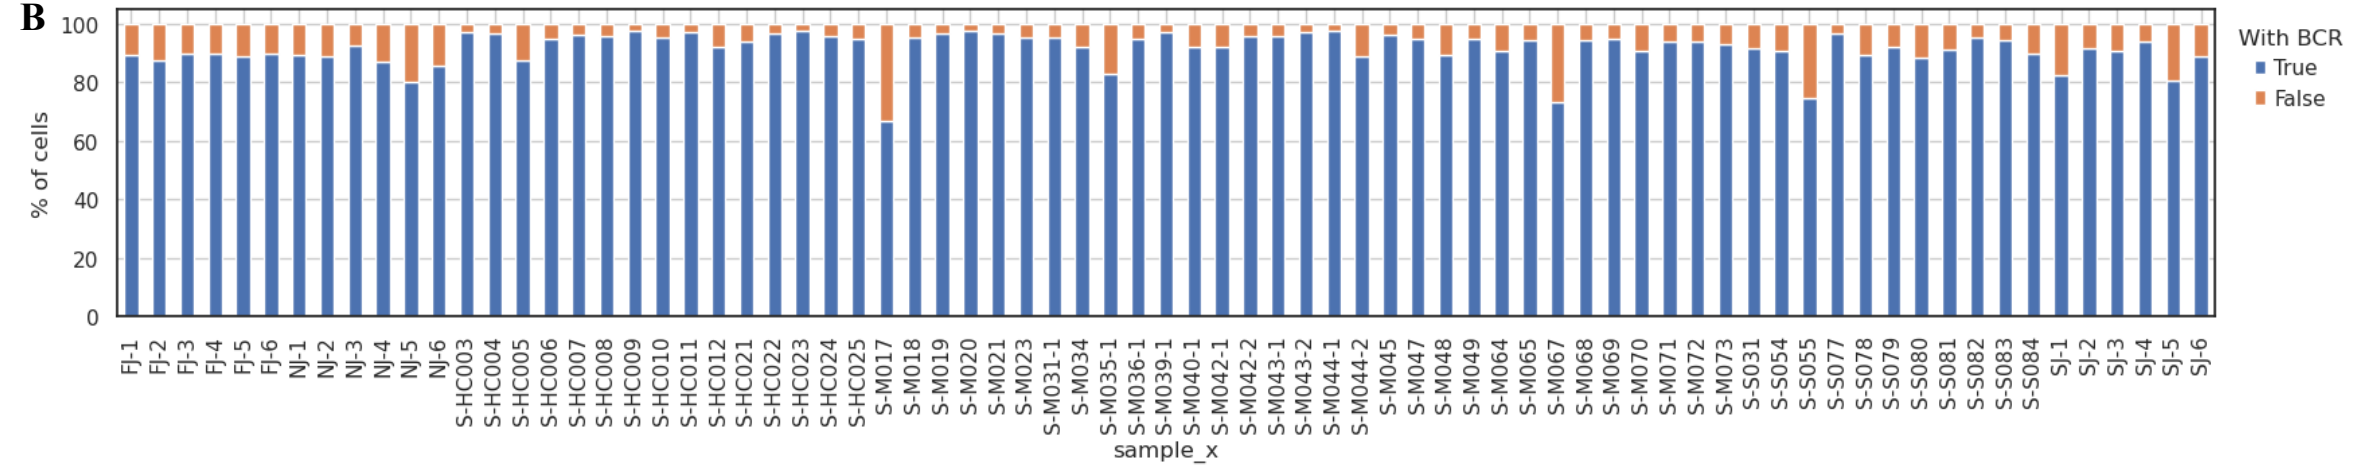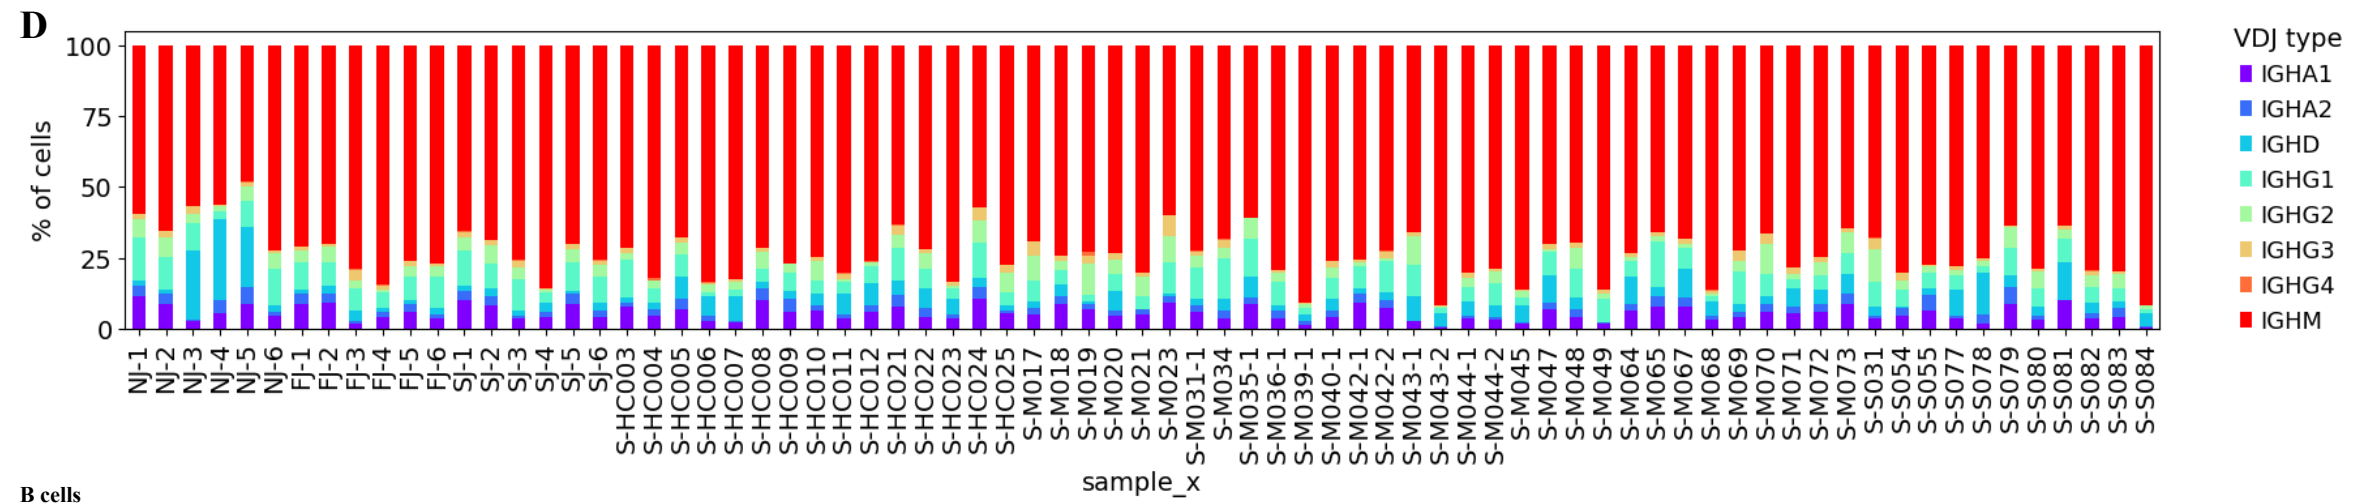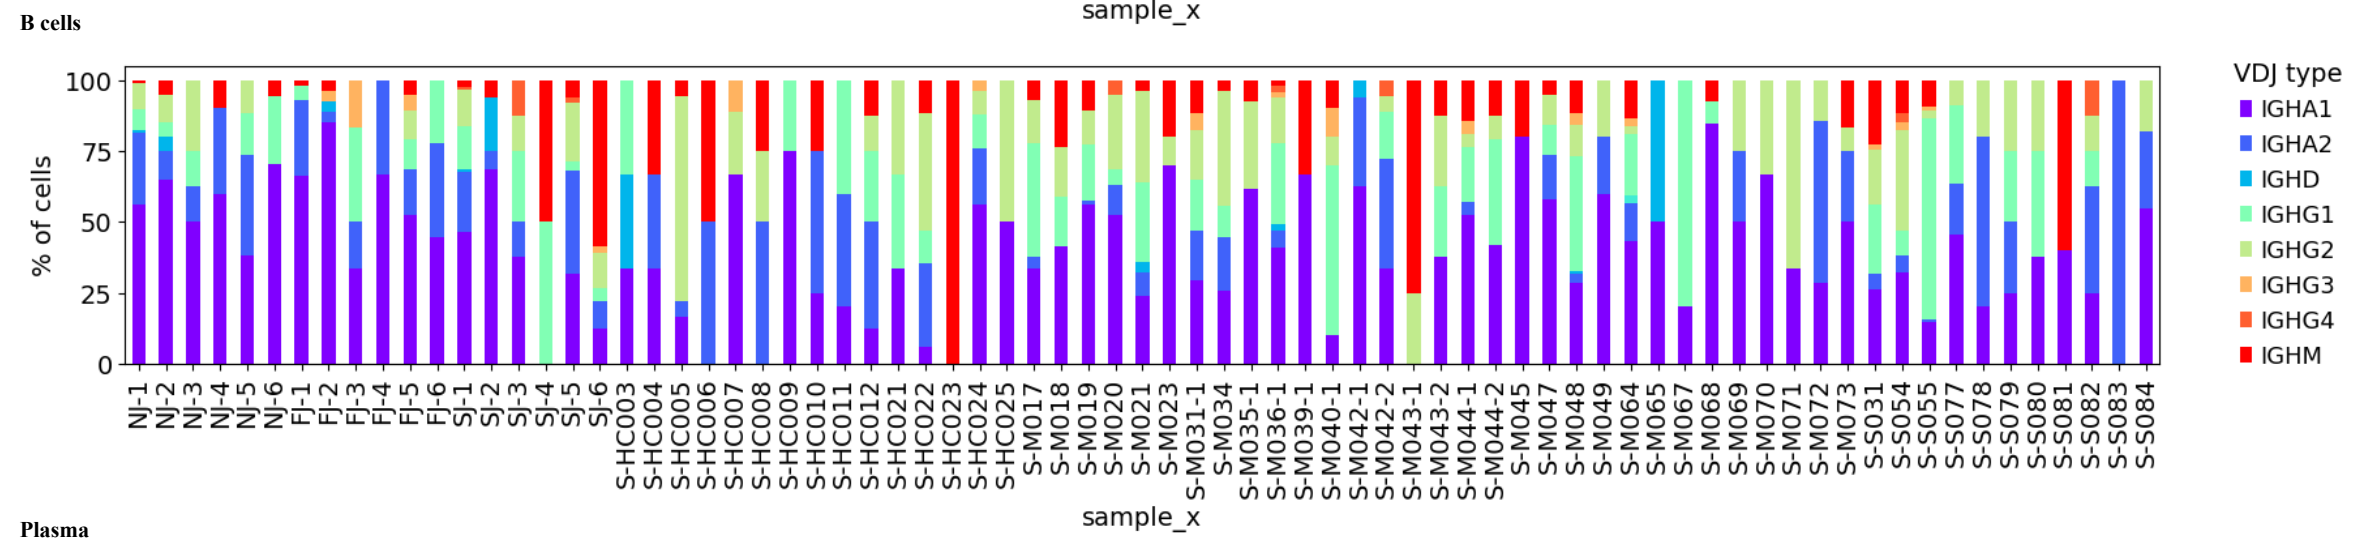

Supplement: JMV-94-5304-s003.pdf [file JMV-94-5304-s003.pdf]

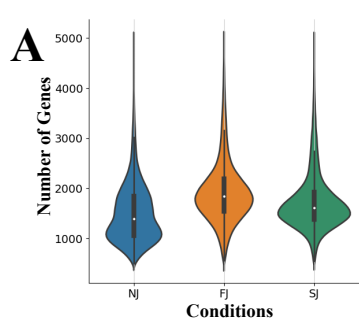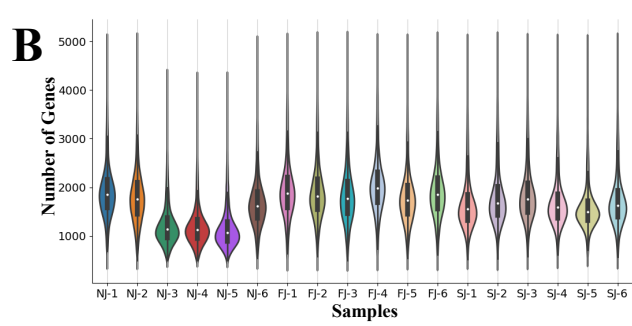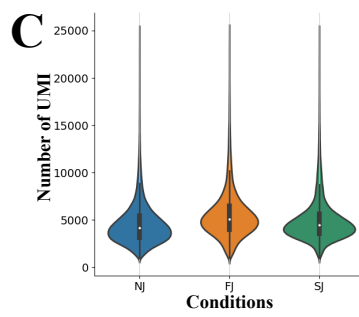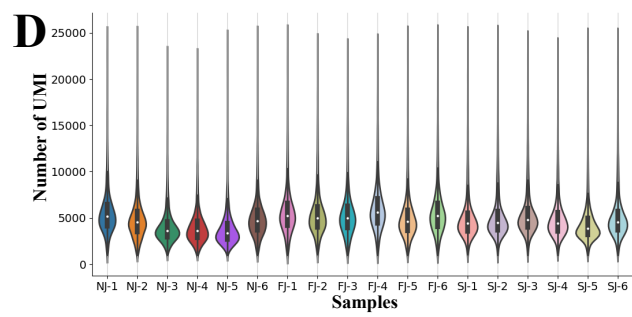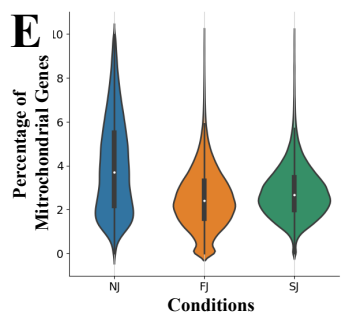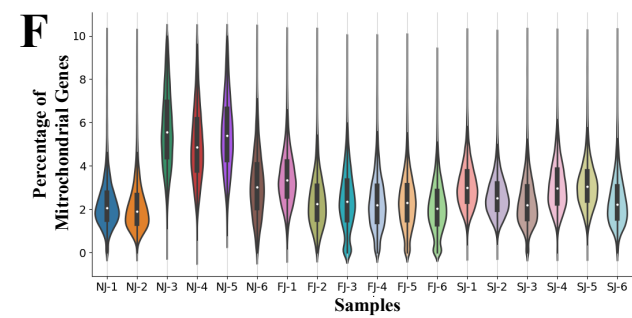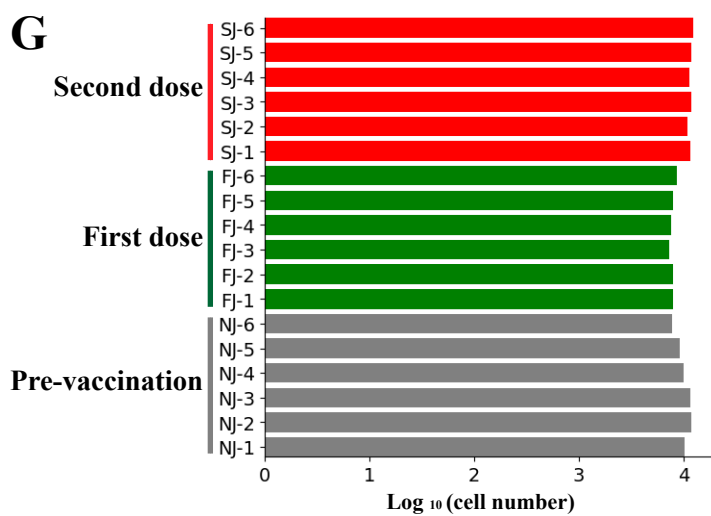

Supplement: JMV-94-5304-s005.pdf [file JMV-94-5304-s005.pdf]

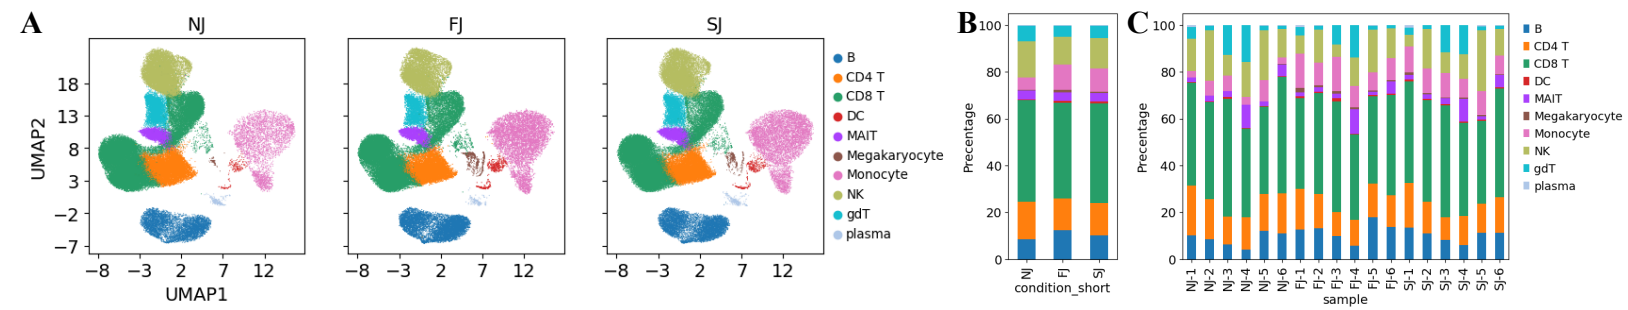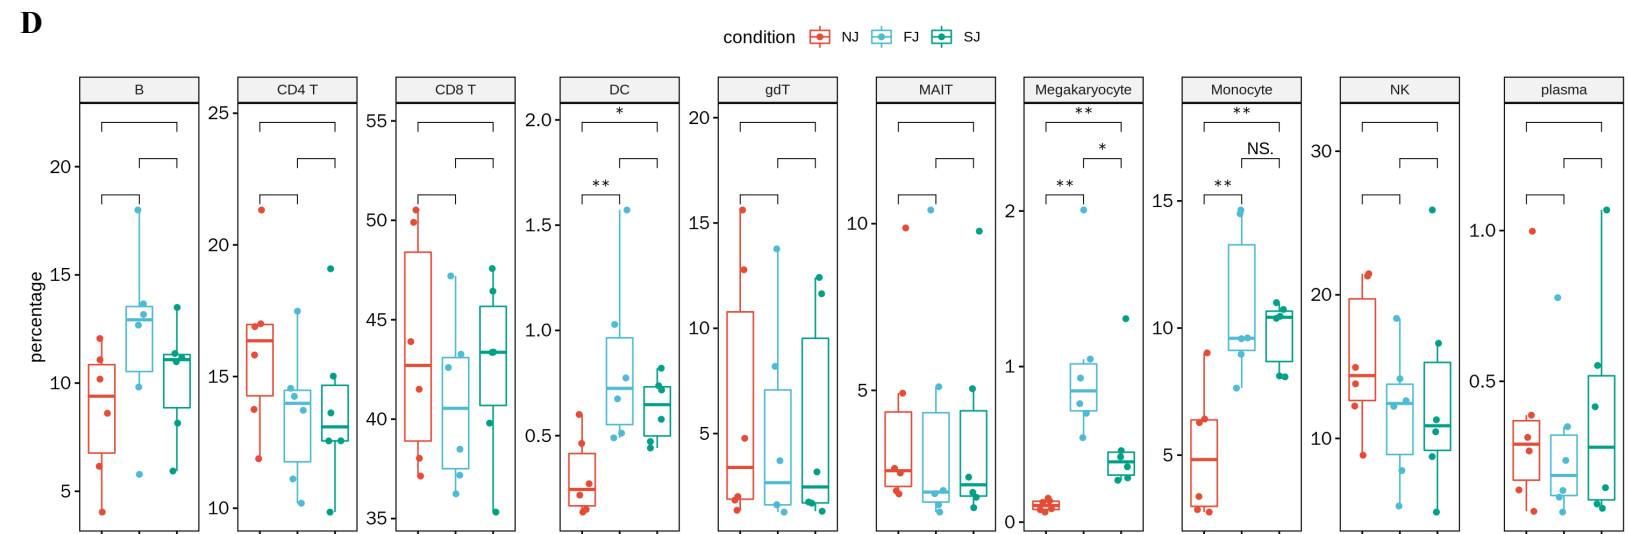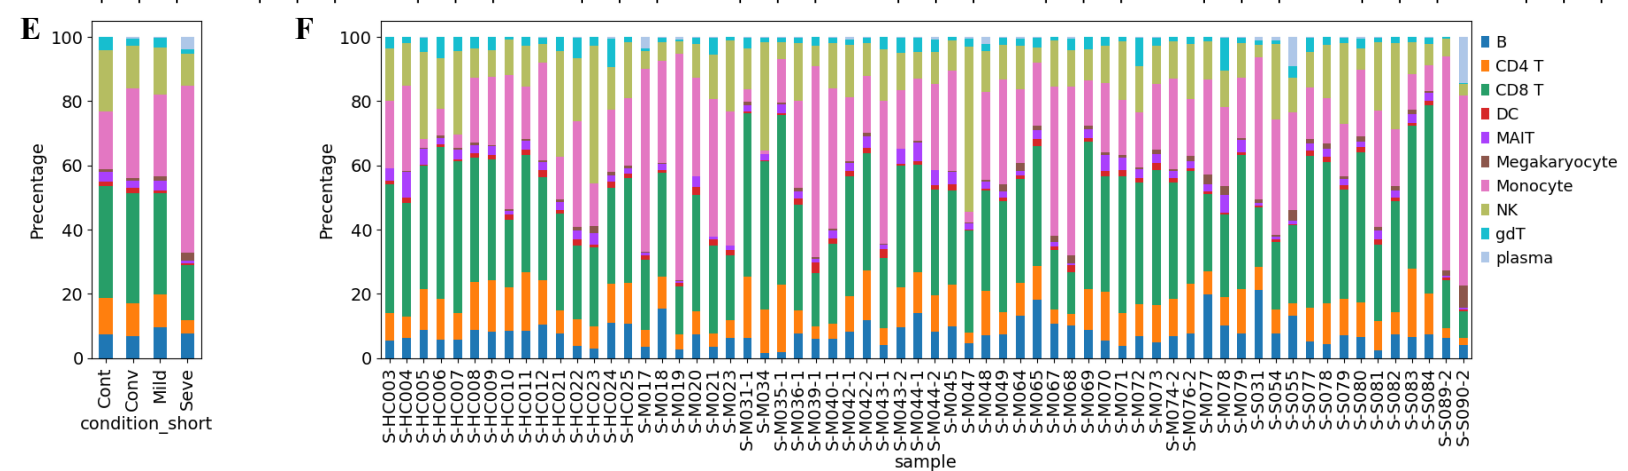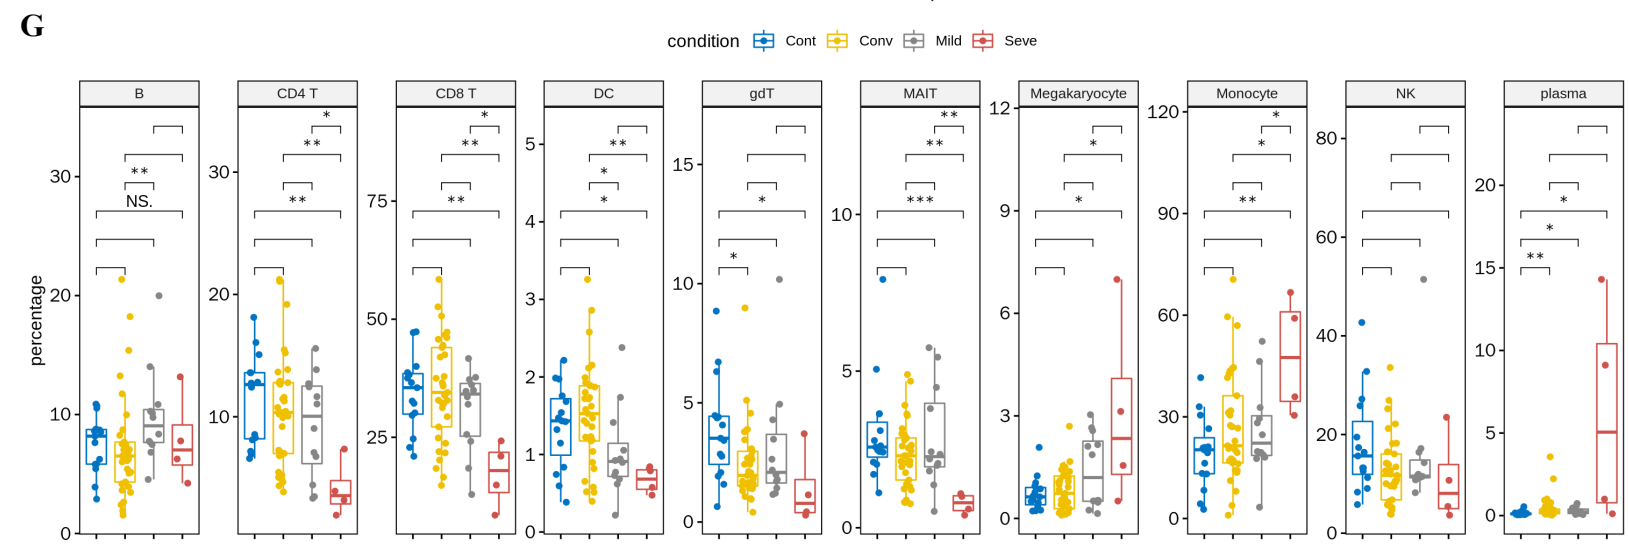

Supplement: JMV-94-5304-s006.pdf [file JMV-94-5304-s006.pdf]

**A**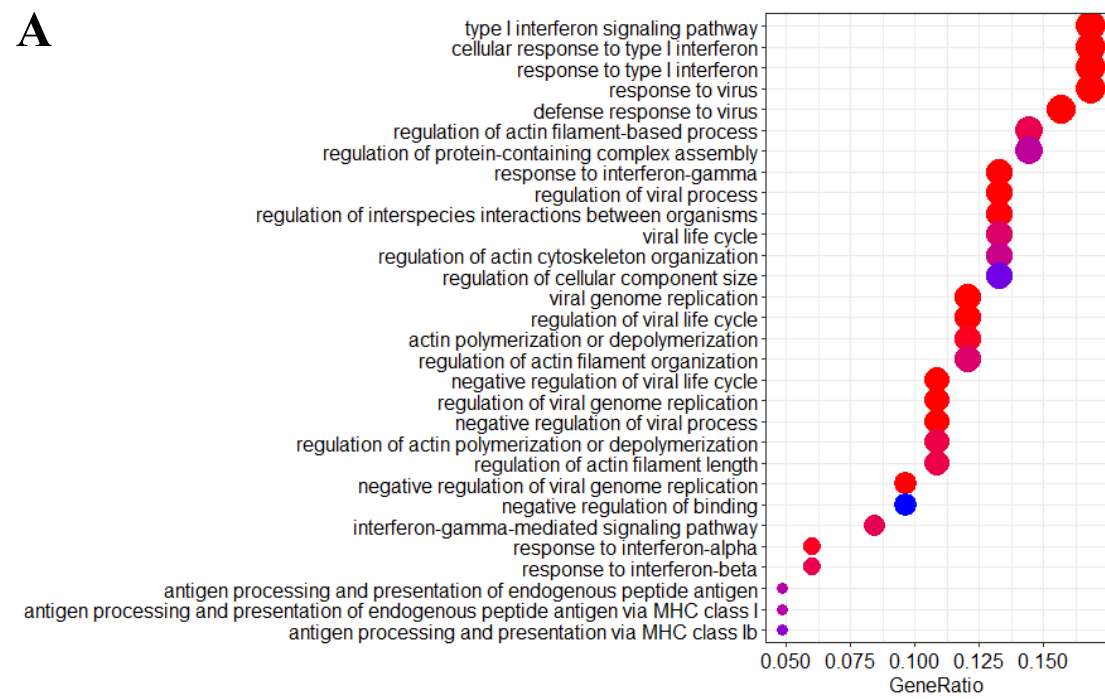**B**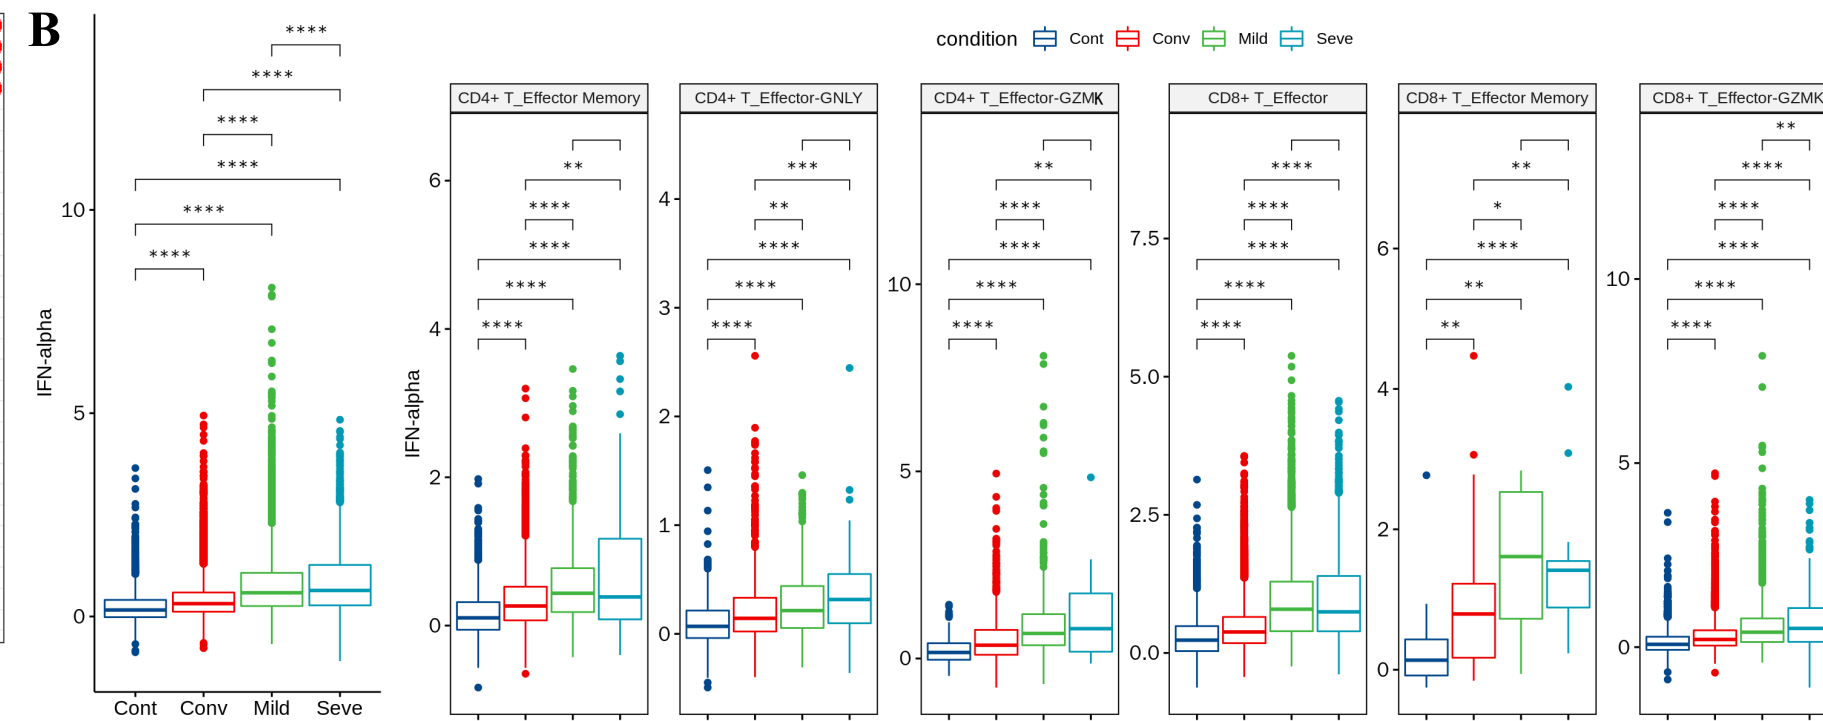**C**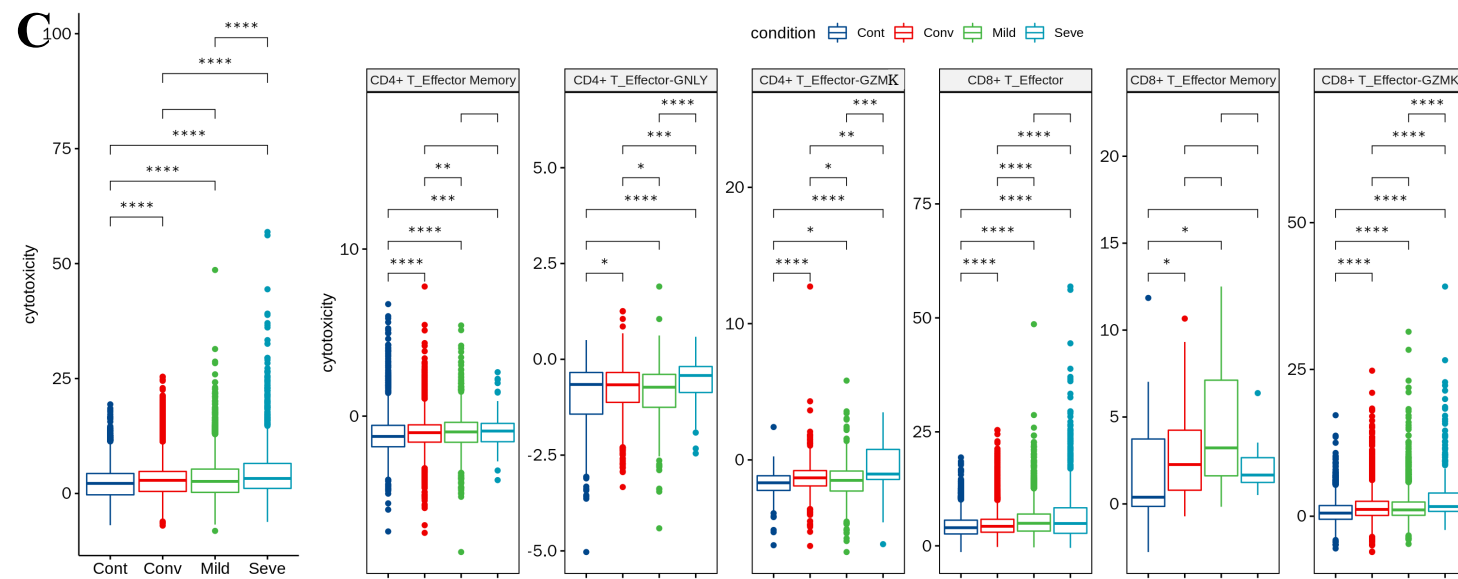**D**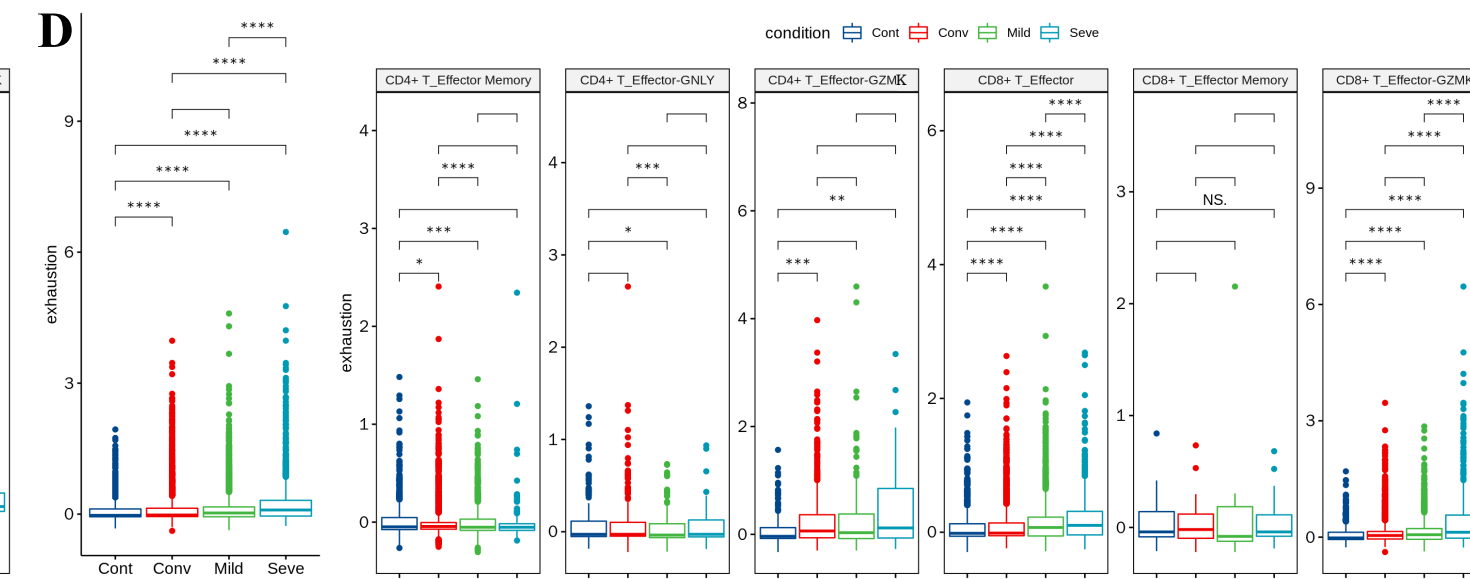**E**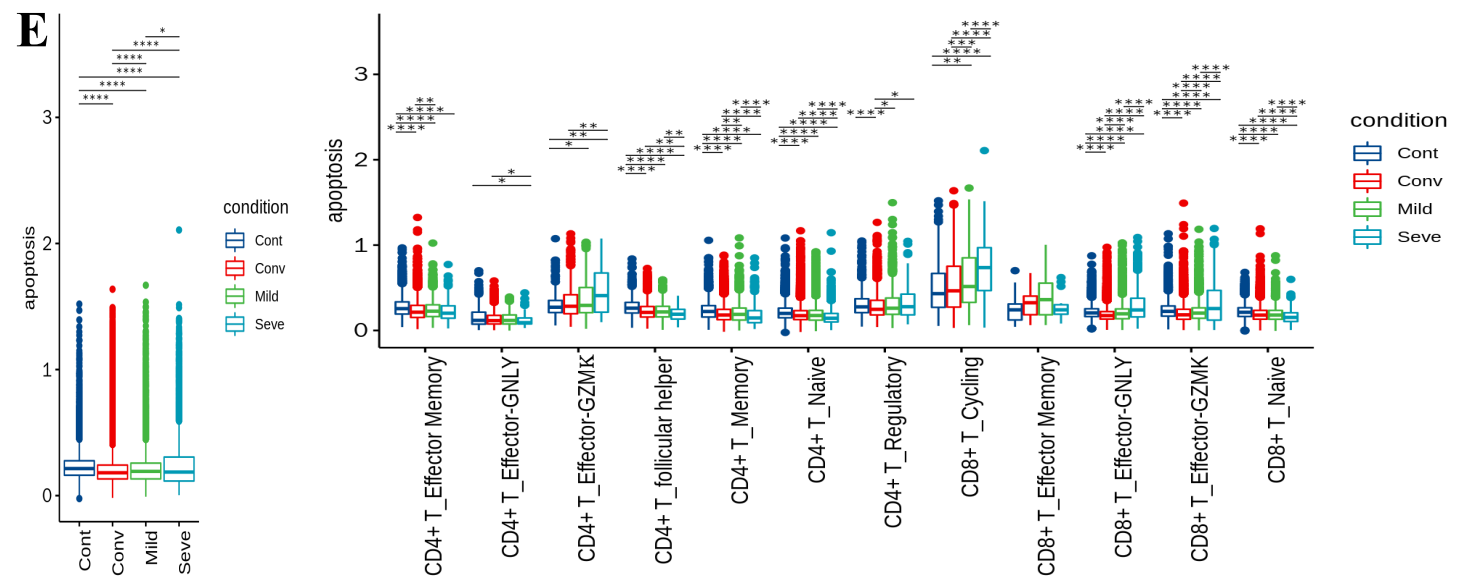**F**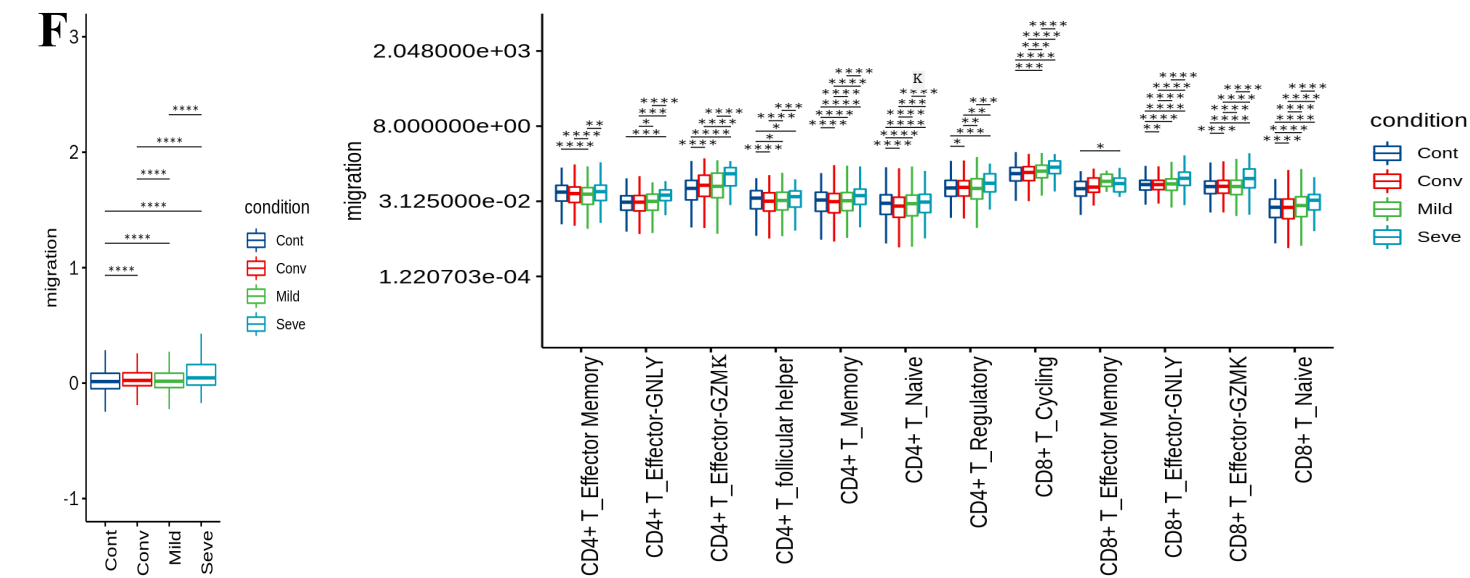

Supplement: JMV-94-5304-s007.pdf [file JMV-94-5304-s007.pdf]

**A**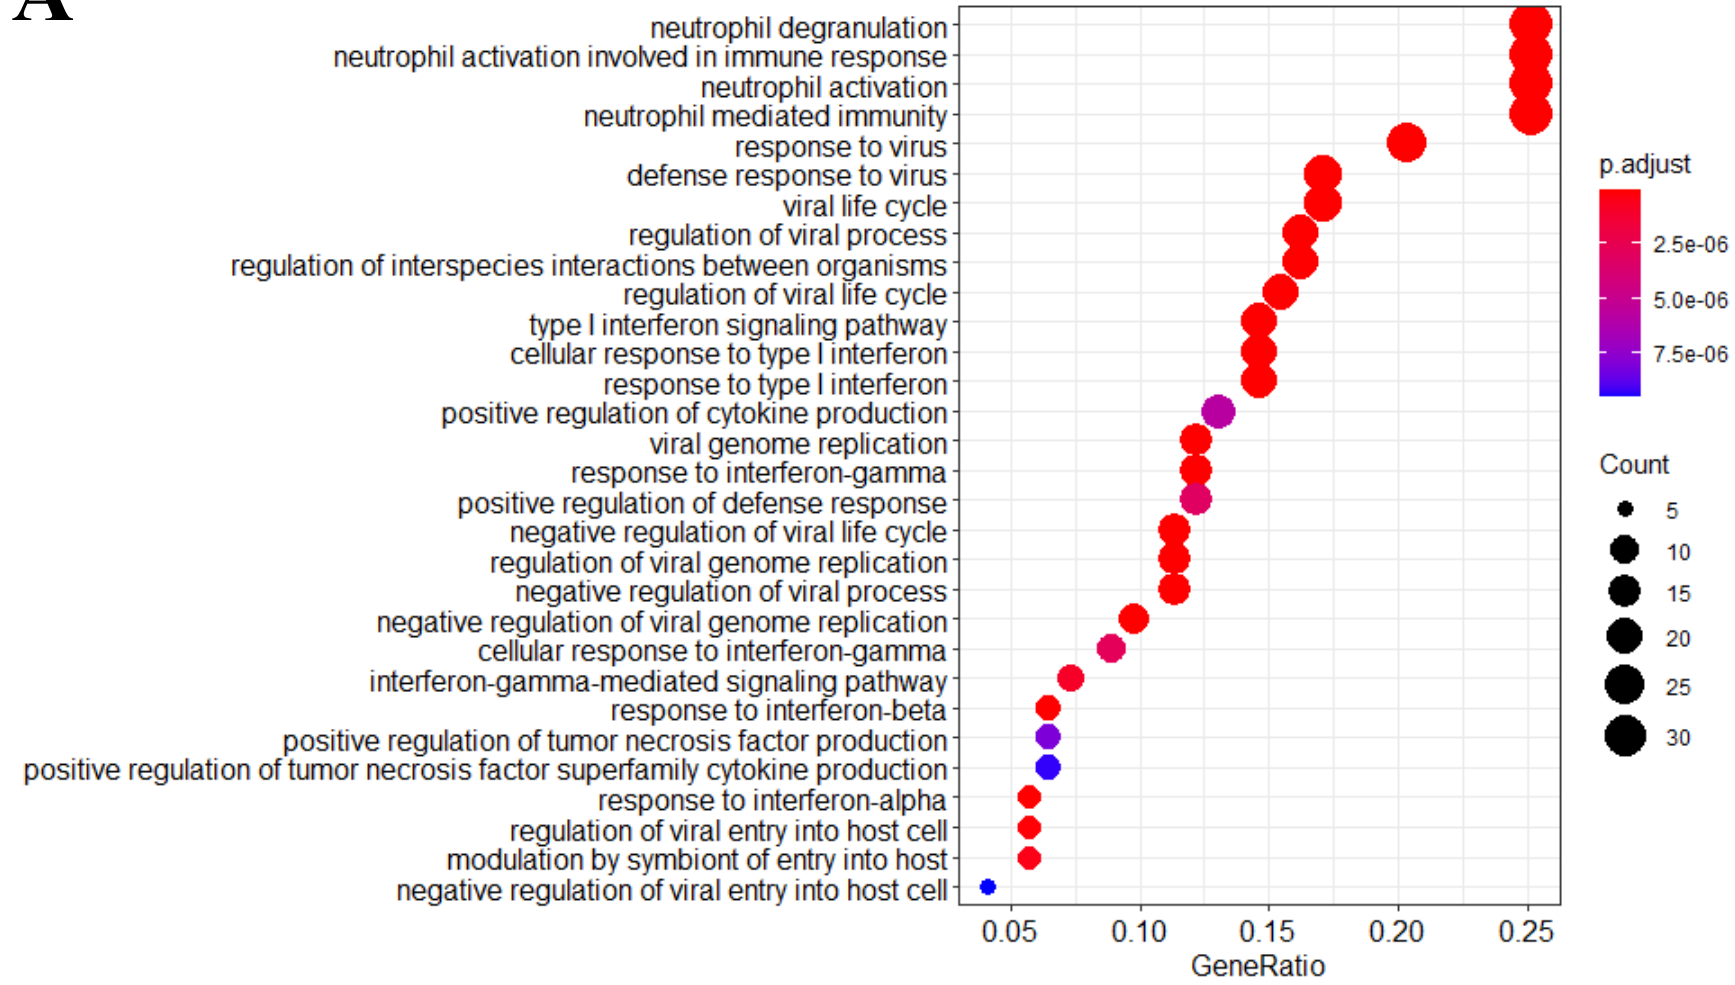**B**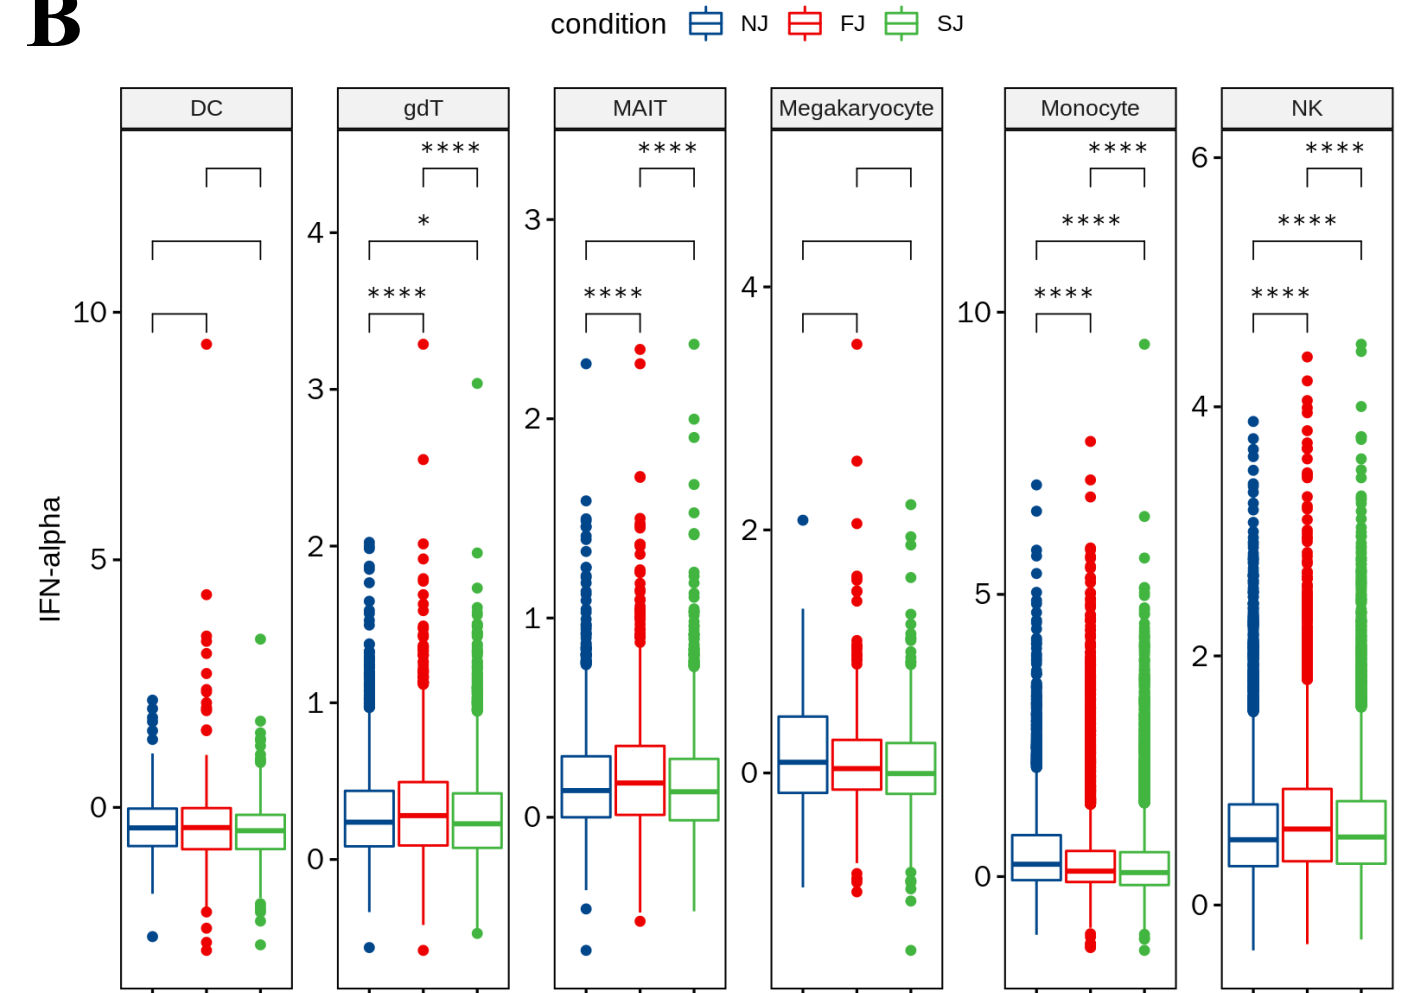**C**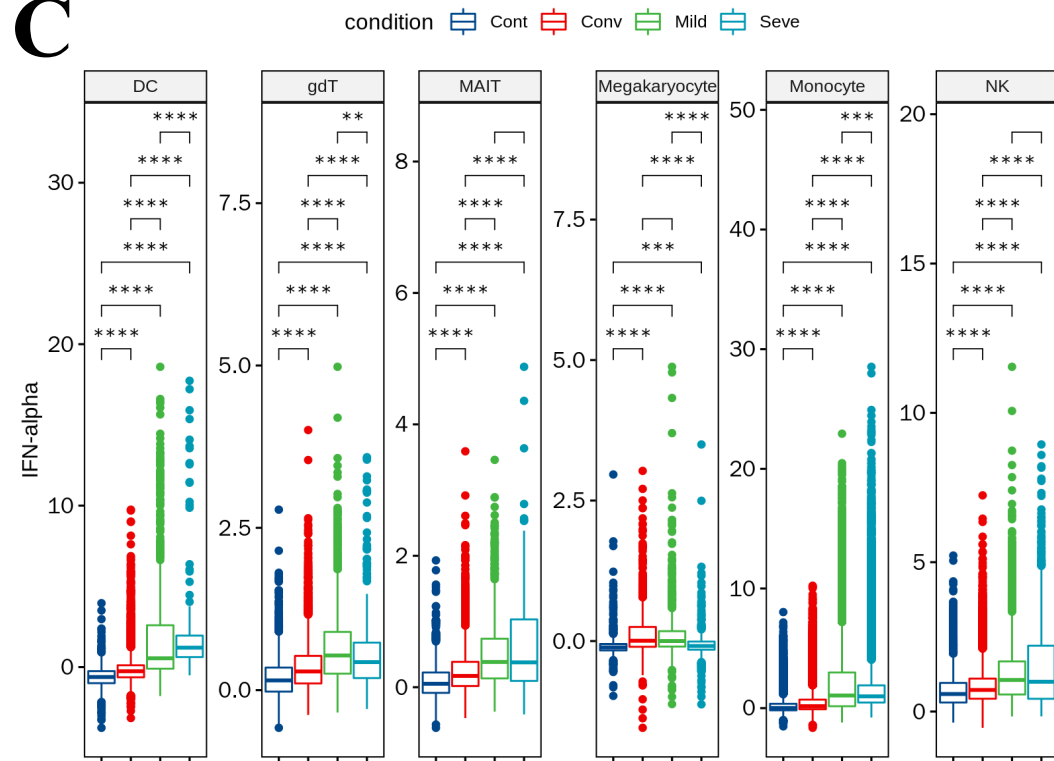**D**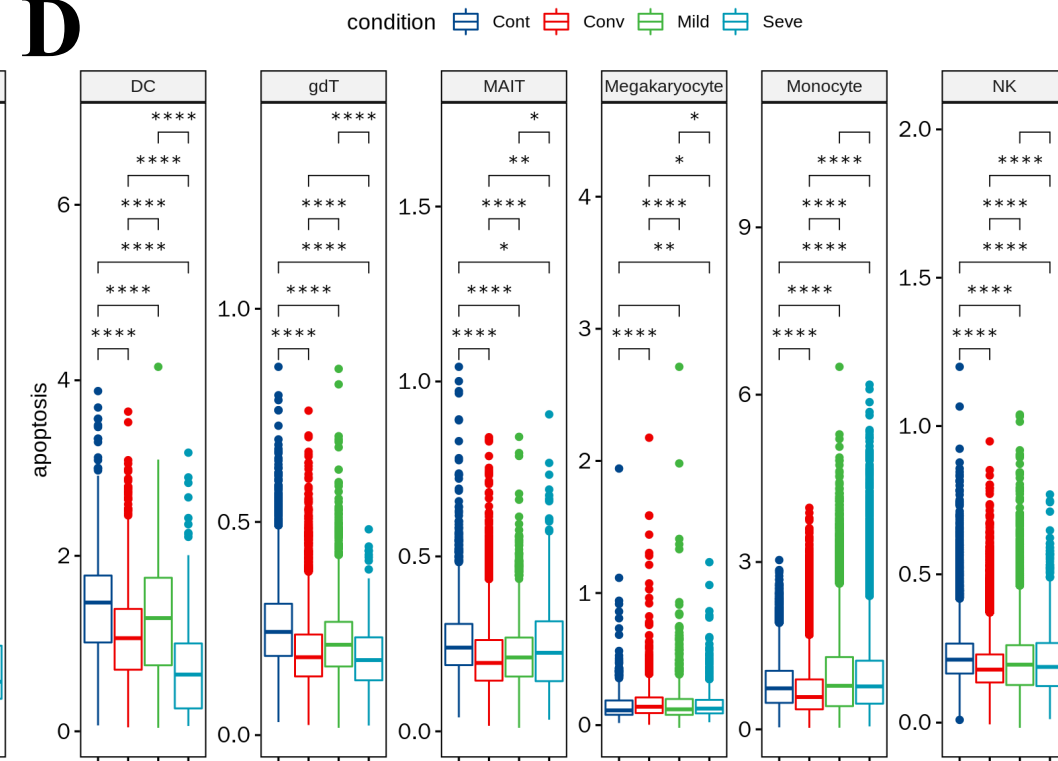**E**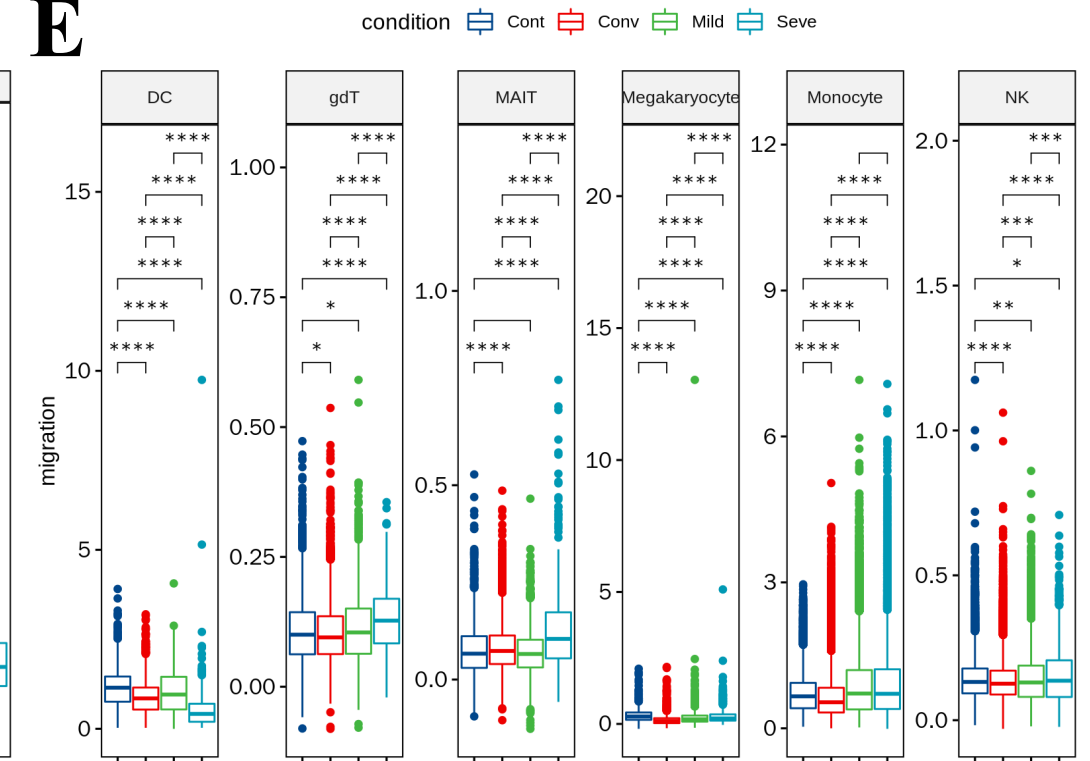

Supplement: JMV-94-5304-s010.pdf [file JMV-94-5304-s010.pdf]

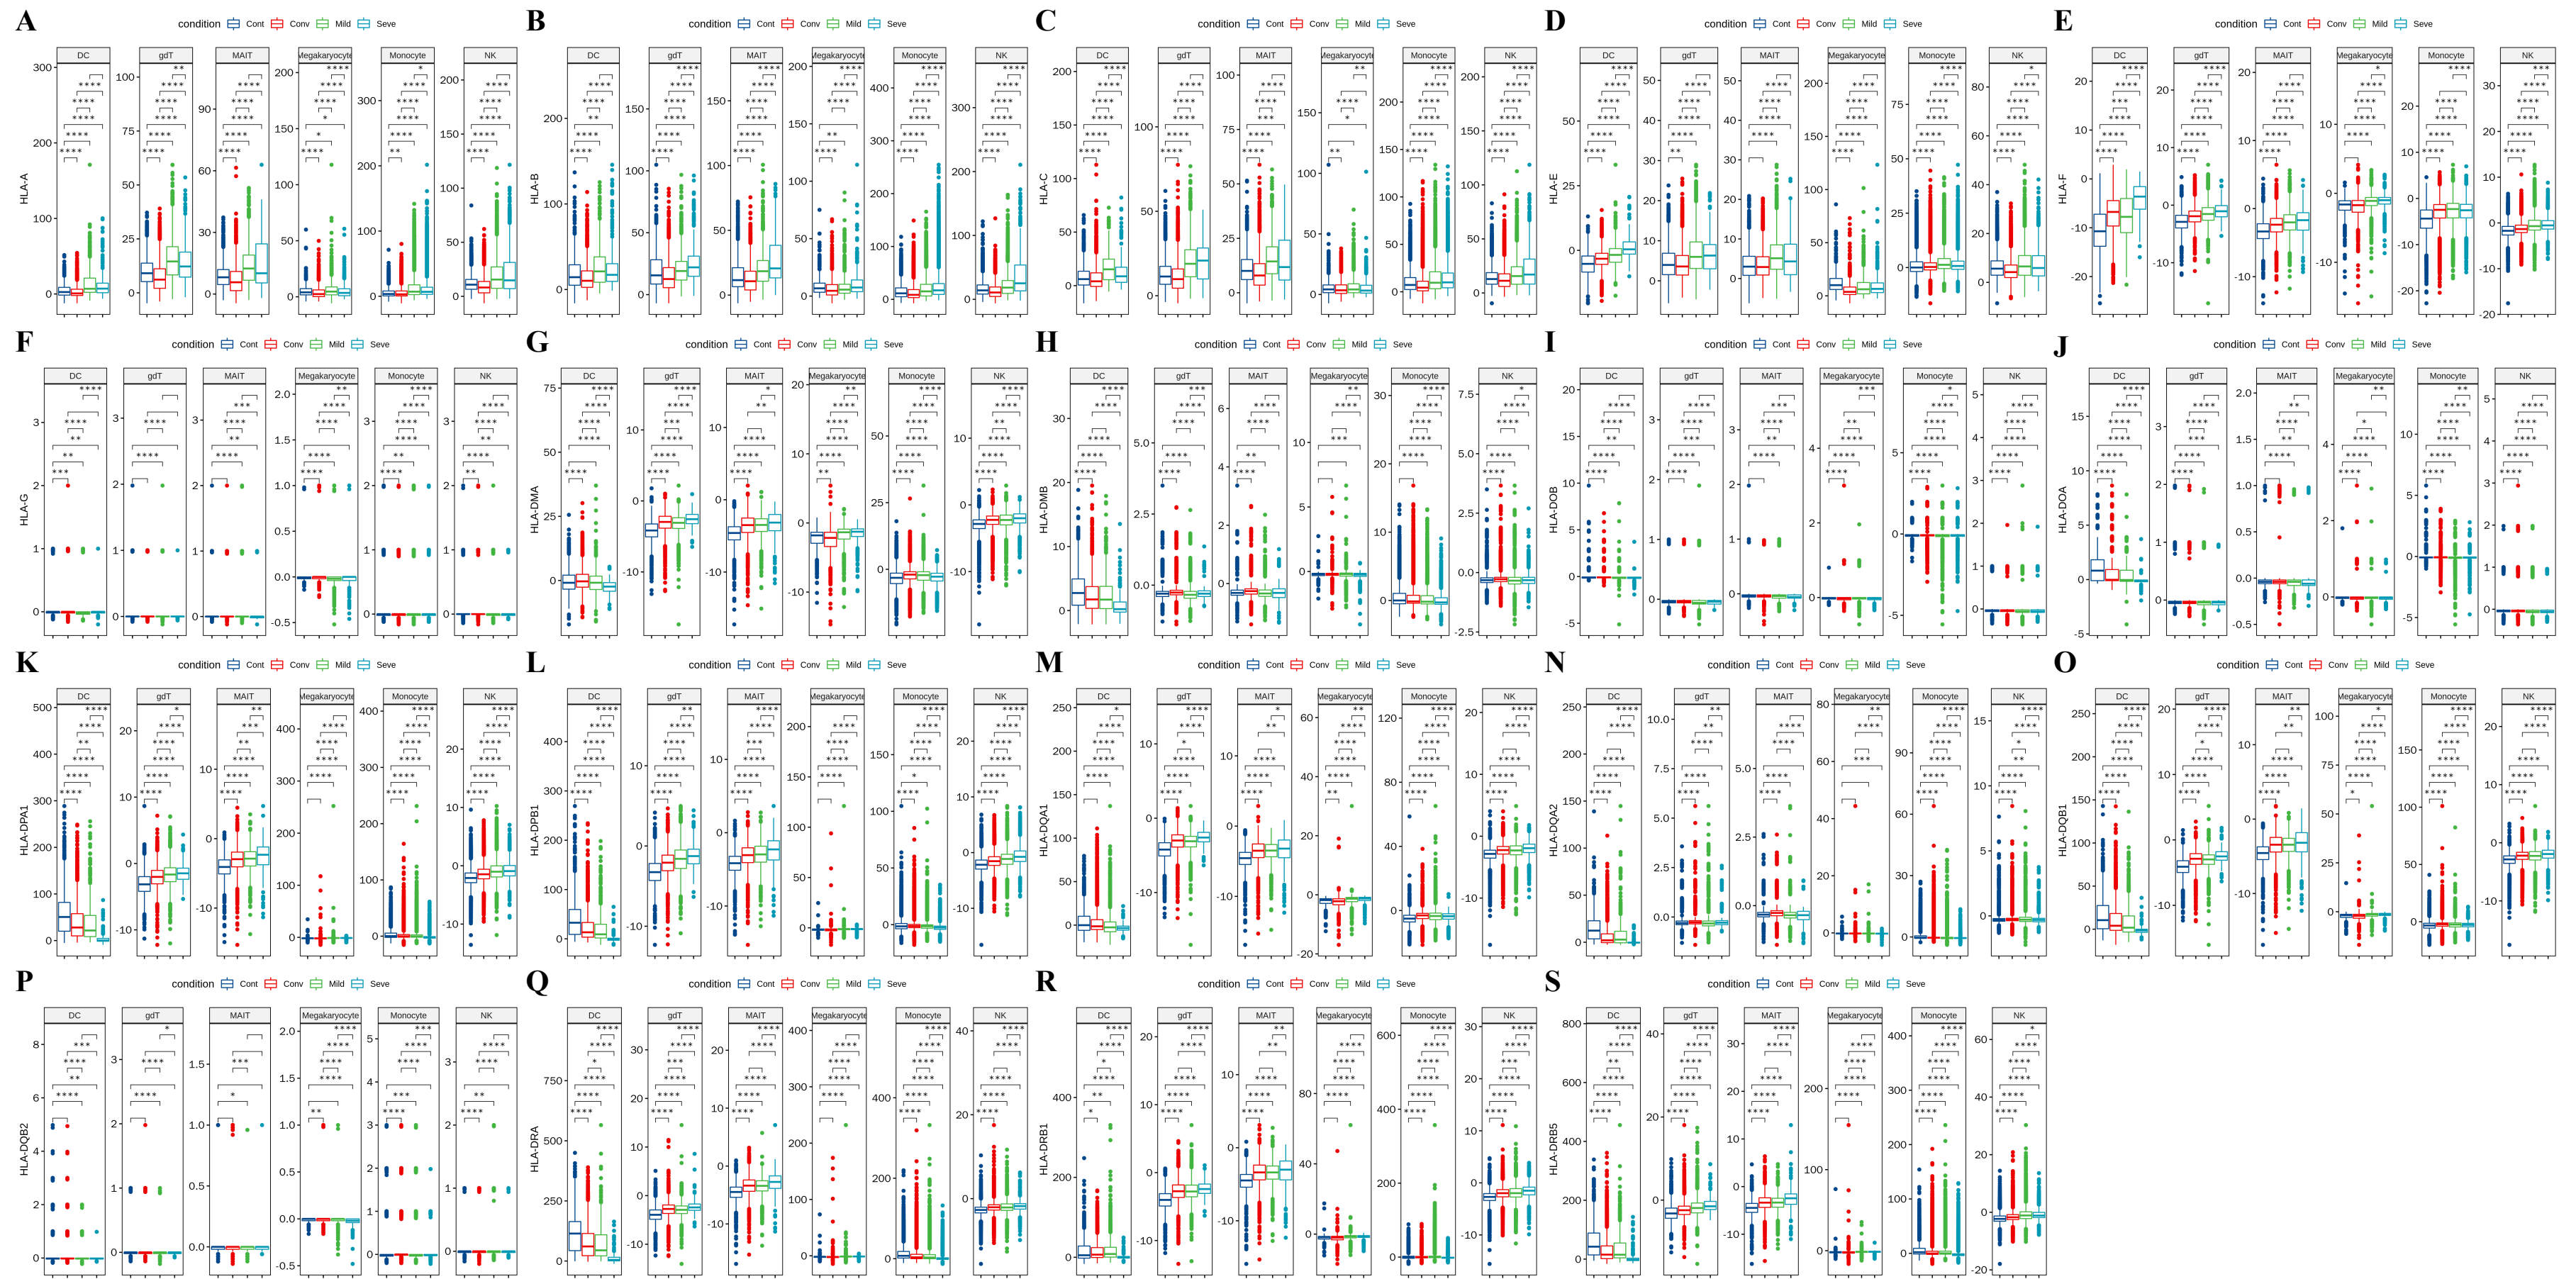

Supplement: JMV-94-5304-s011.pdf [file JMV-94-5304-s011.pdf]

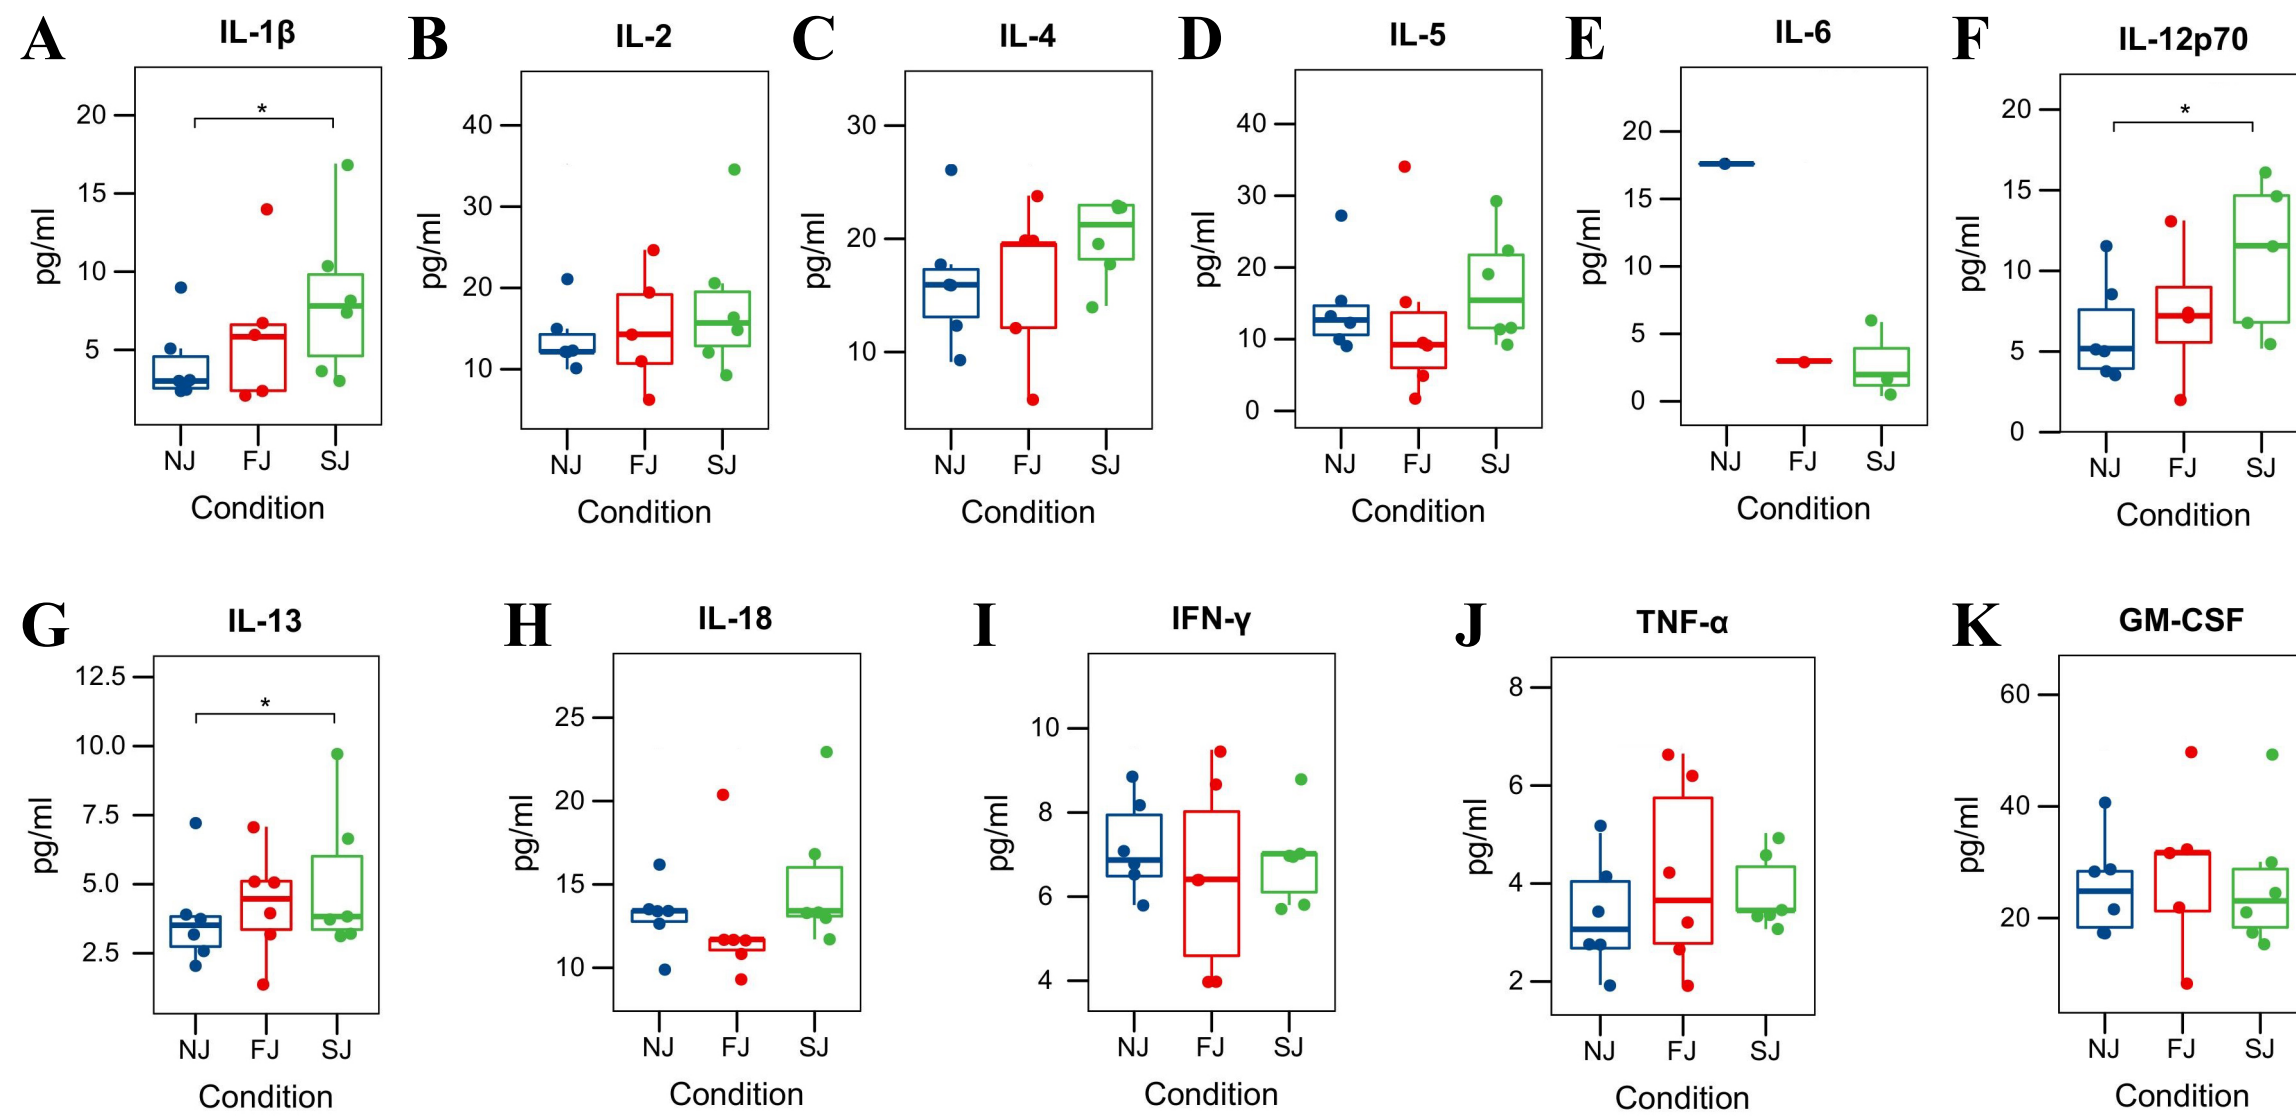

Supplement: JMV-94-5304-s013.pdf [file JMV-94-5304-s013.pdf]

**A**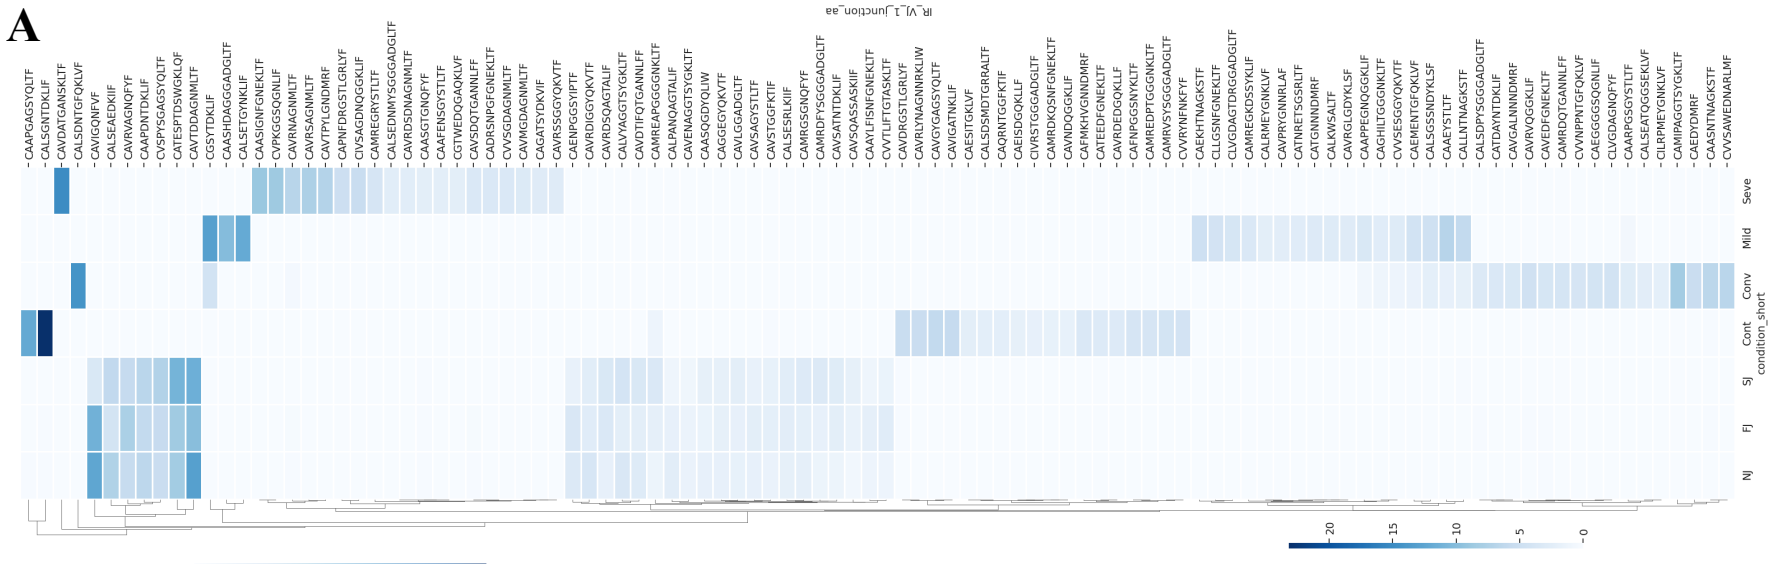**B**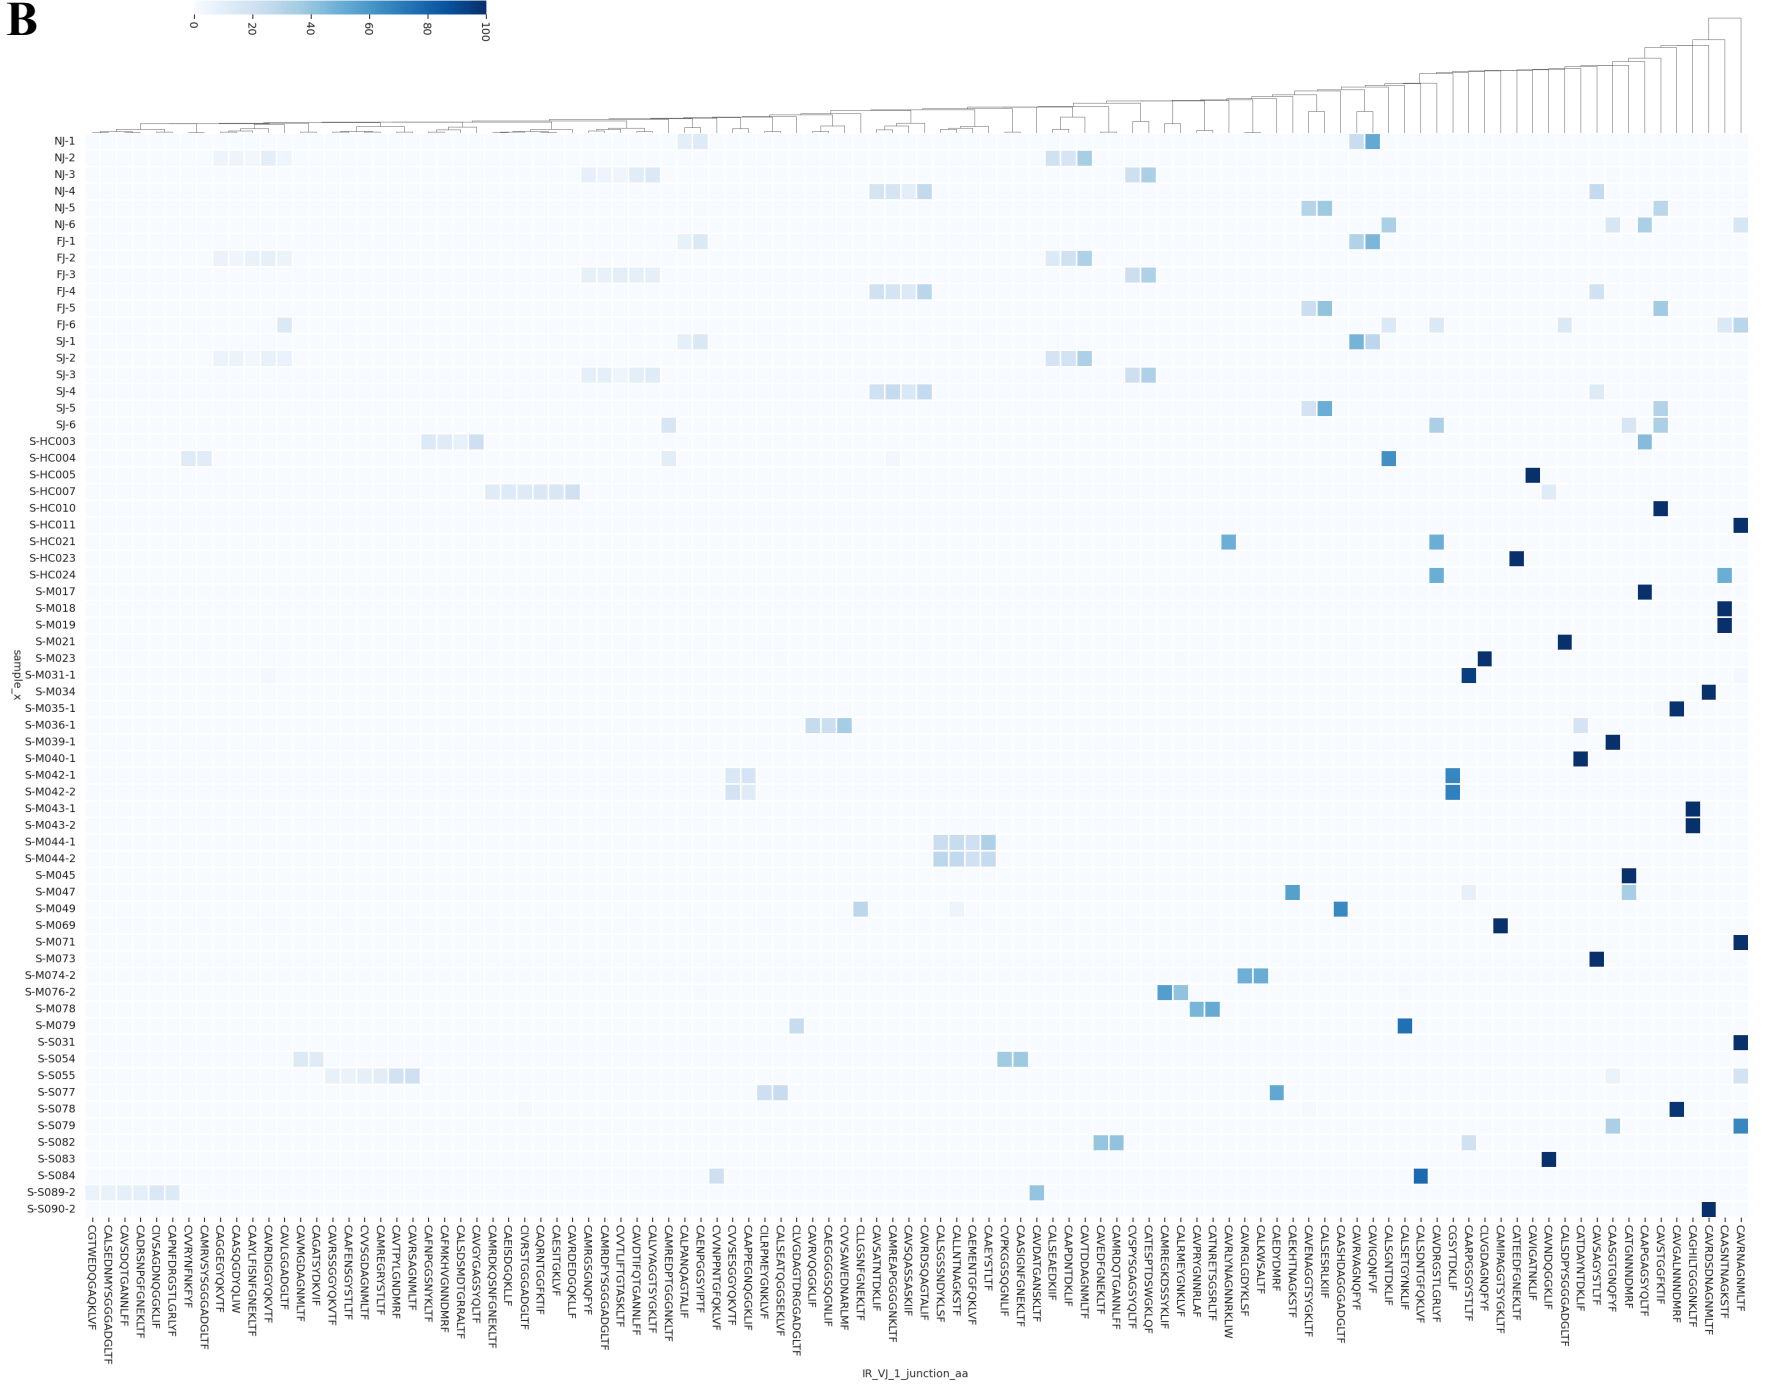

Supplement: JMV-94-5304-s015.pdf [file JMV-94-5304-s015.pdf]

**A**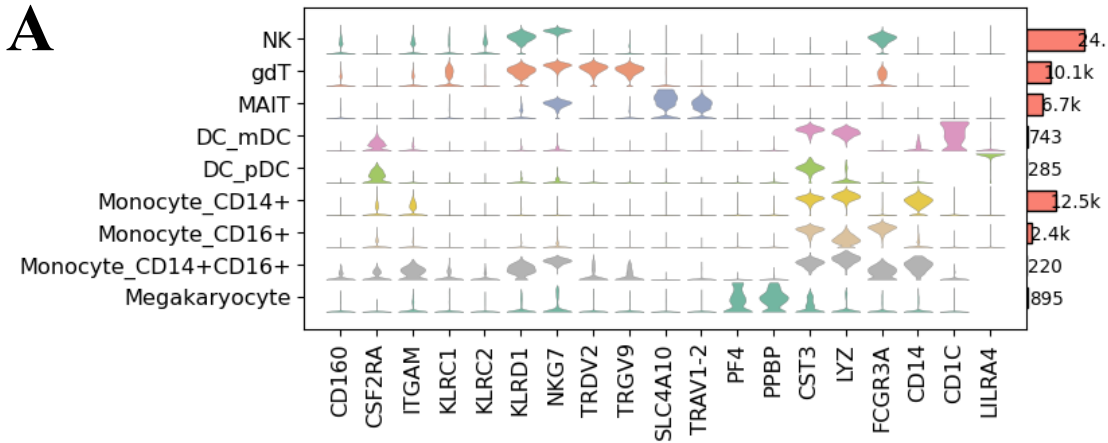**B**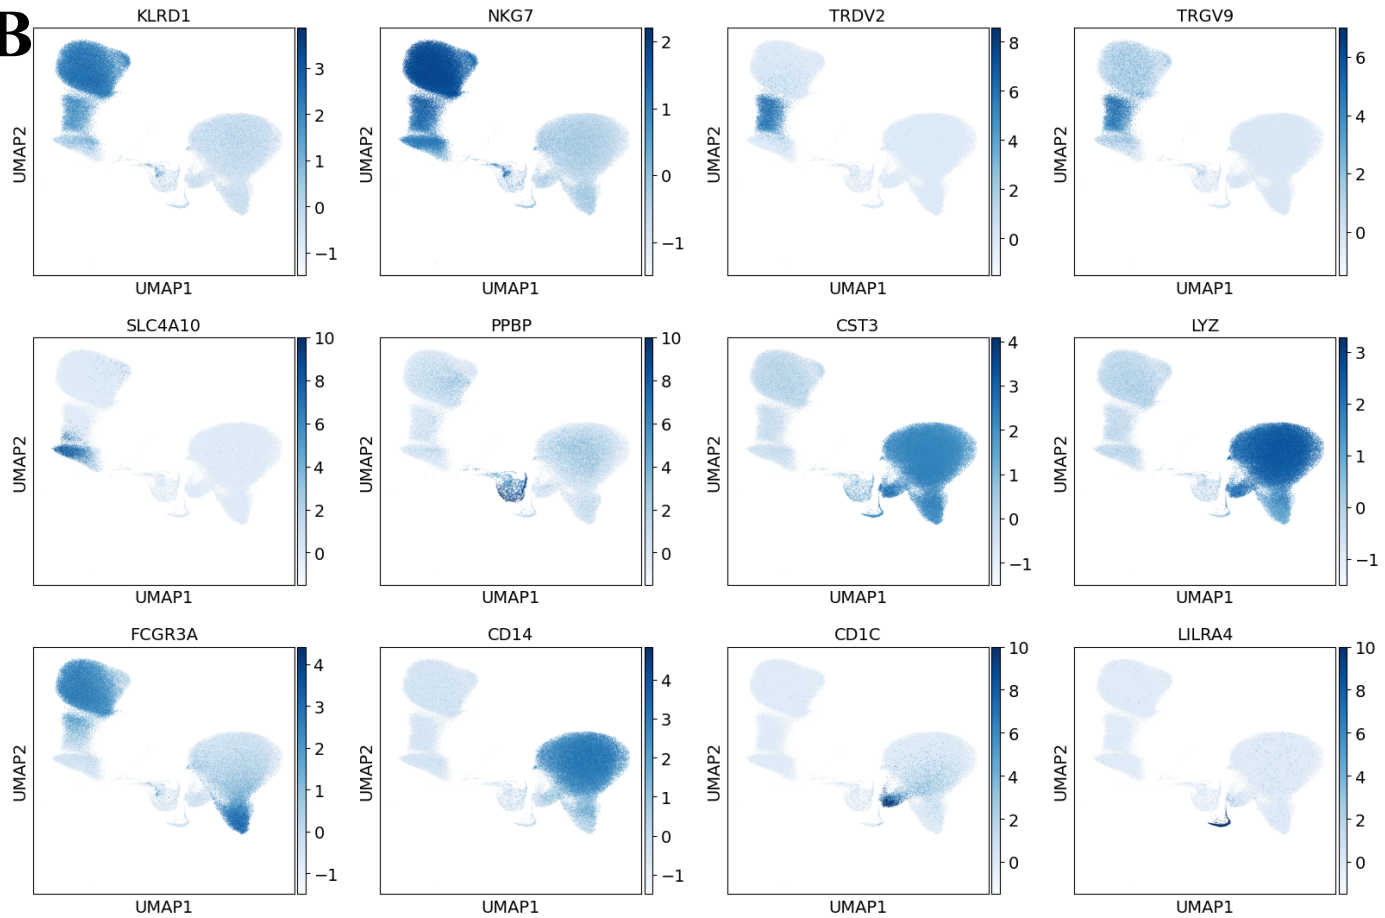**C**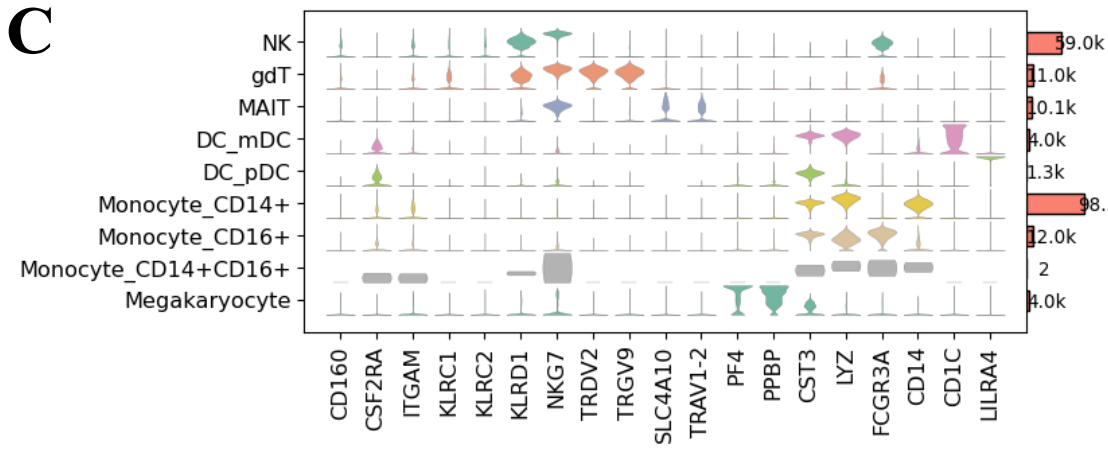**D**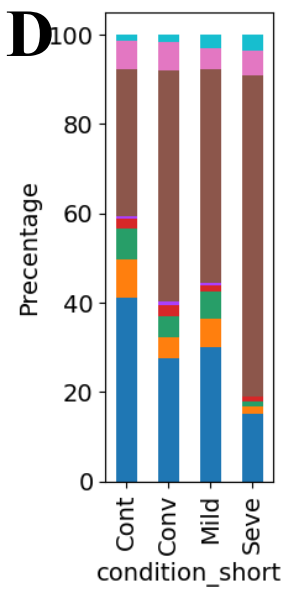**E**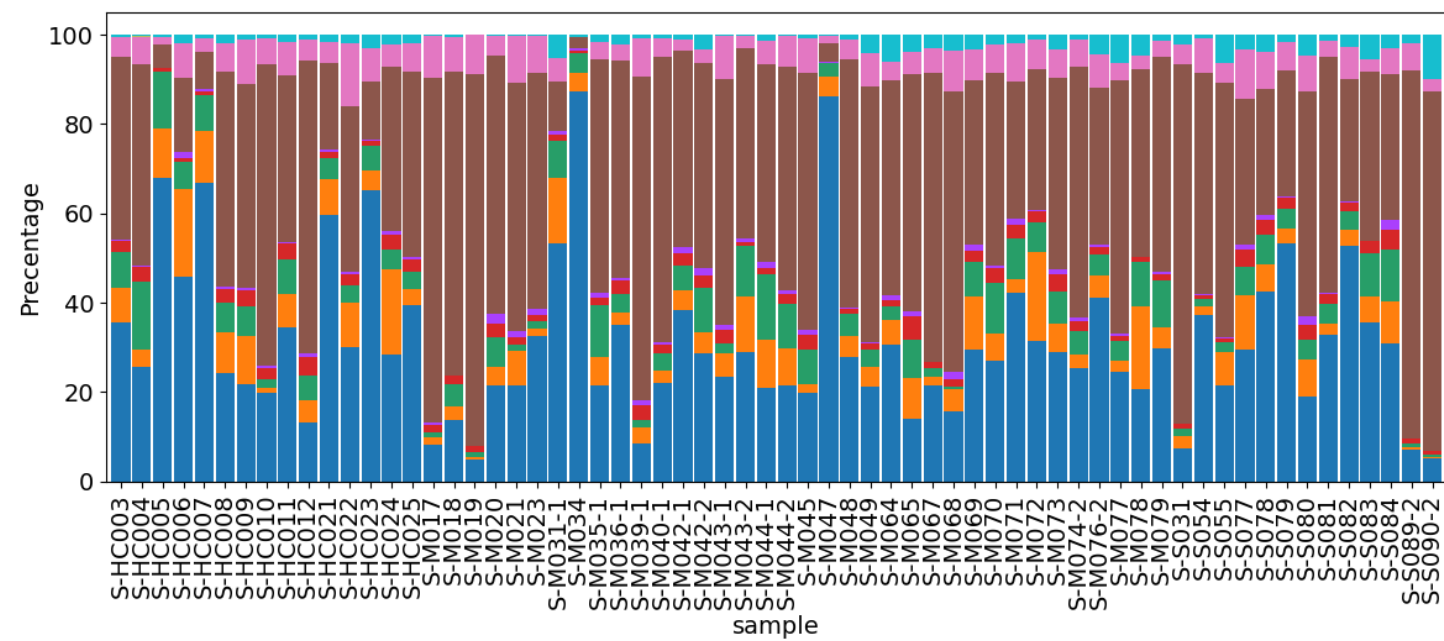**F**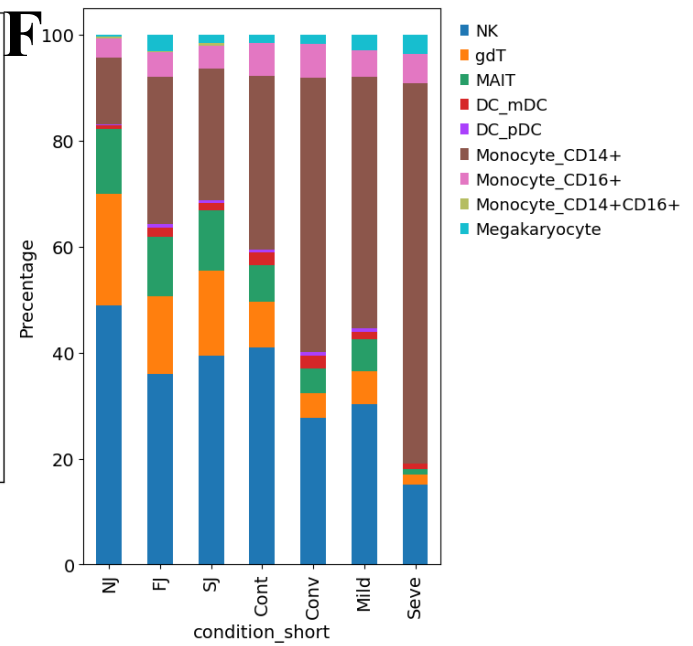

Supplement: JMV-94-5304-s016.pdf [file JMV-94-5304-s016.pdf]

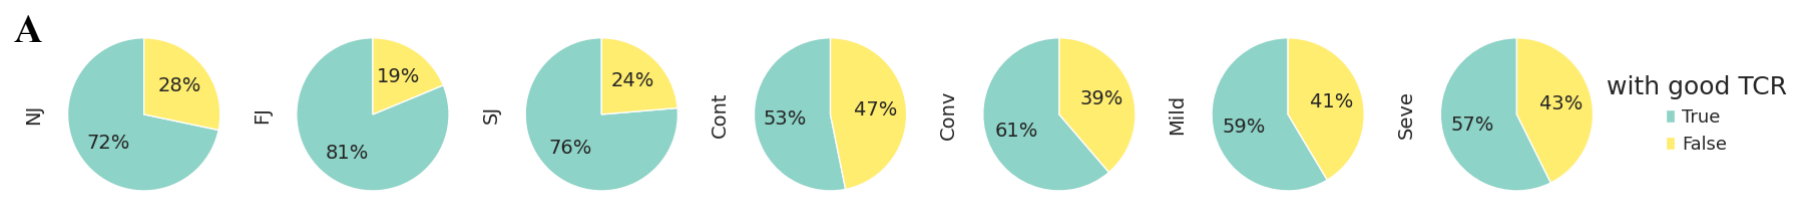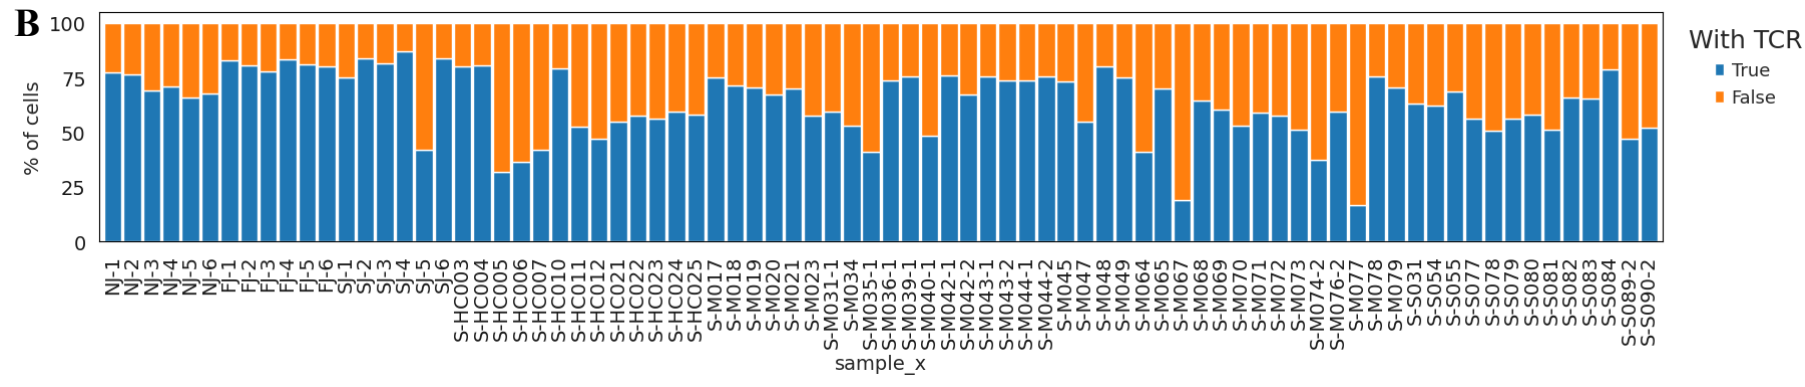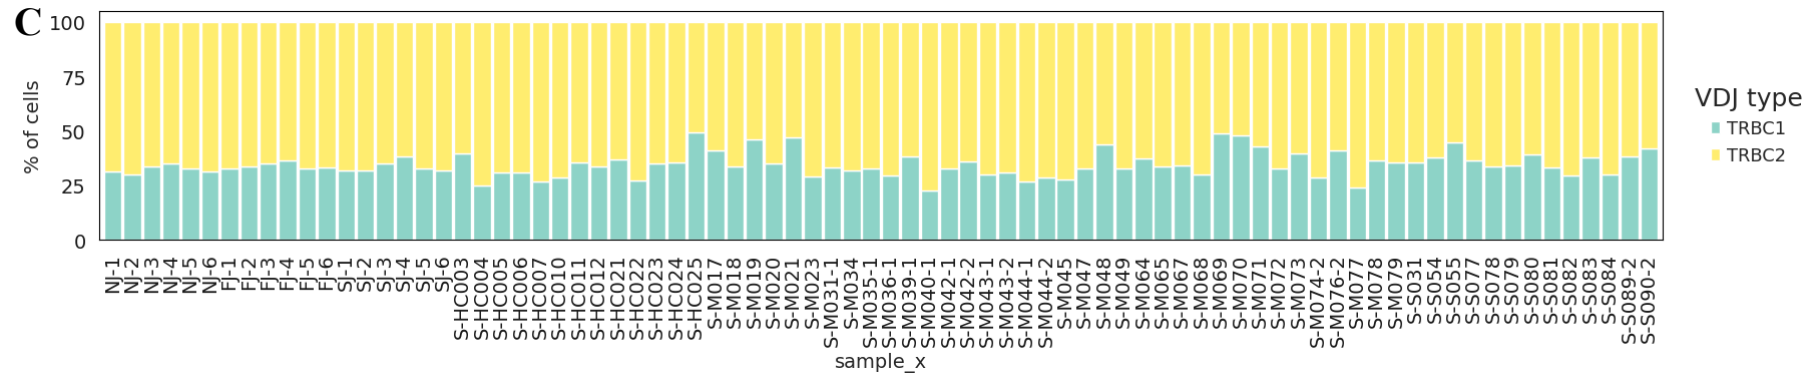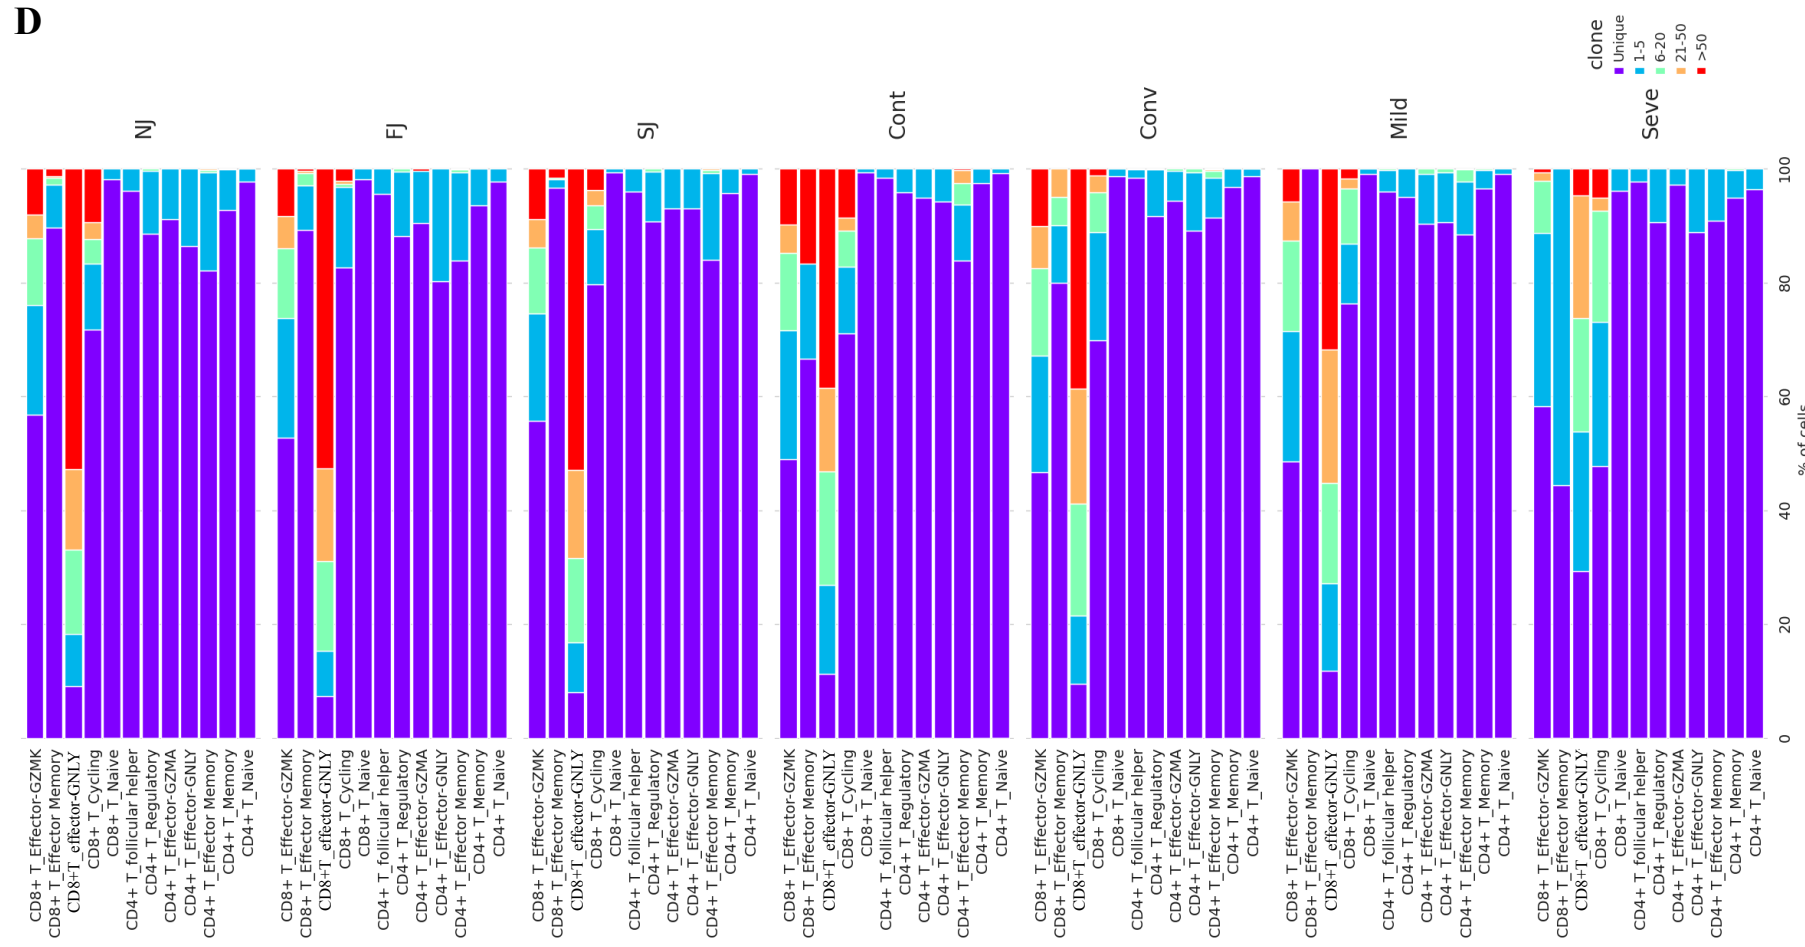

Supplement: JMV-94-5304-s018.pdf [file JMV-94-5304-s018.pdf]

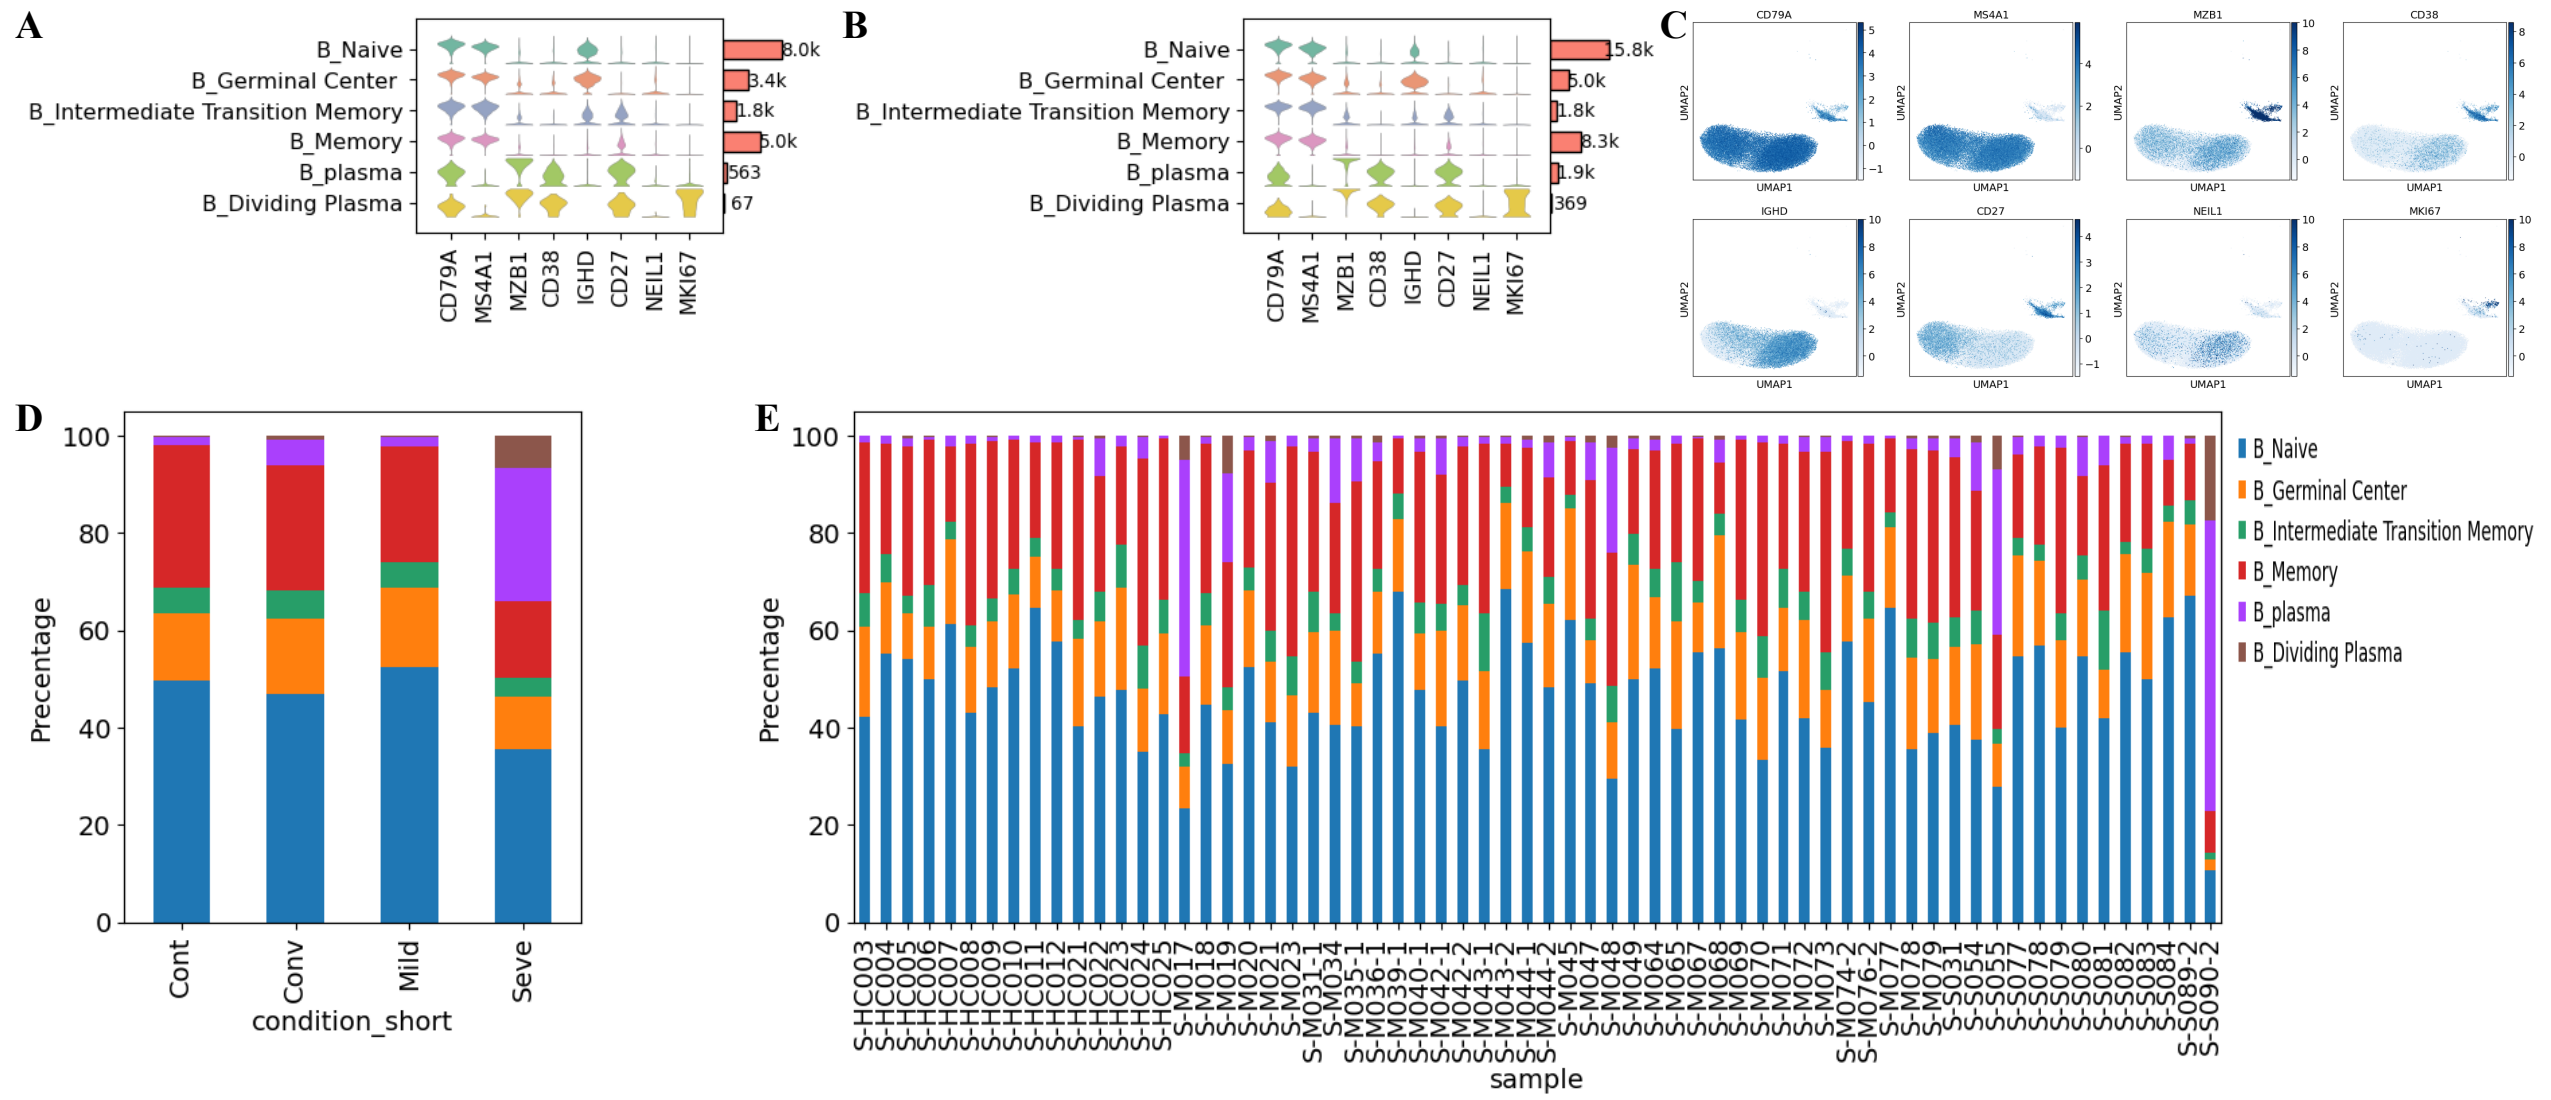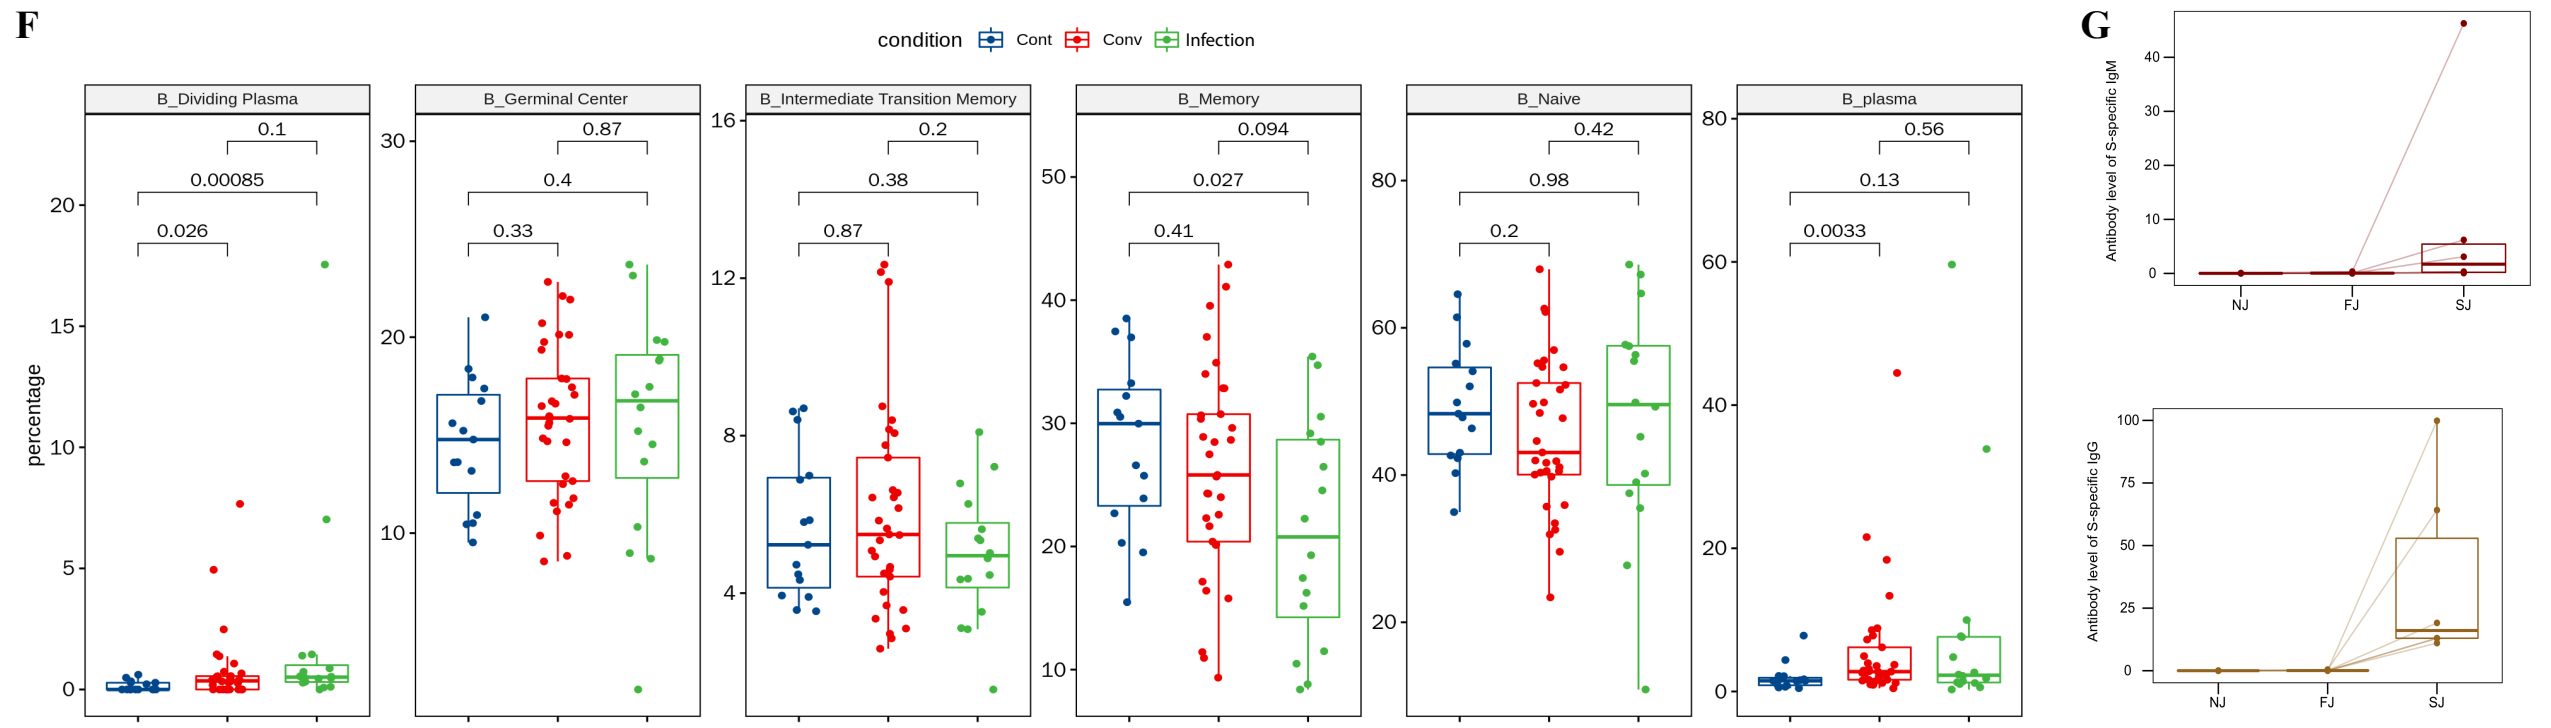

Supplement: JMV-94-5304-s021.pdf [file JMV-94-5304-s021.pdf]

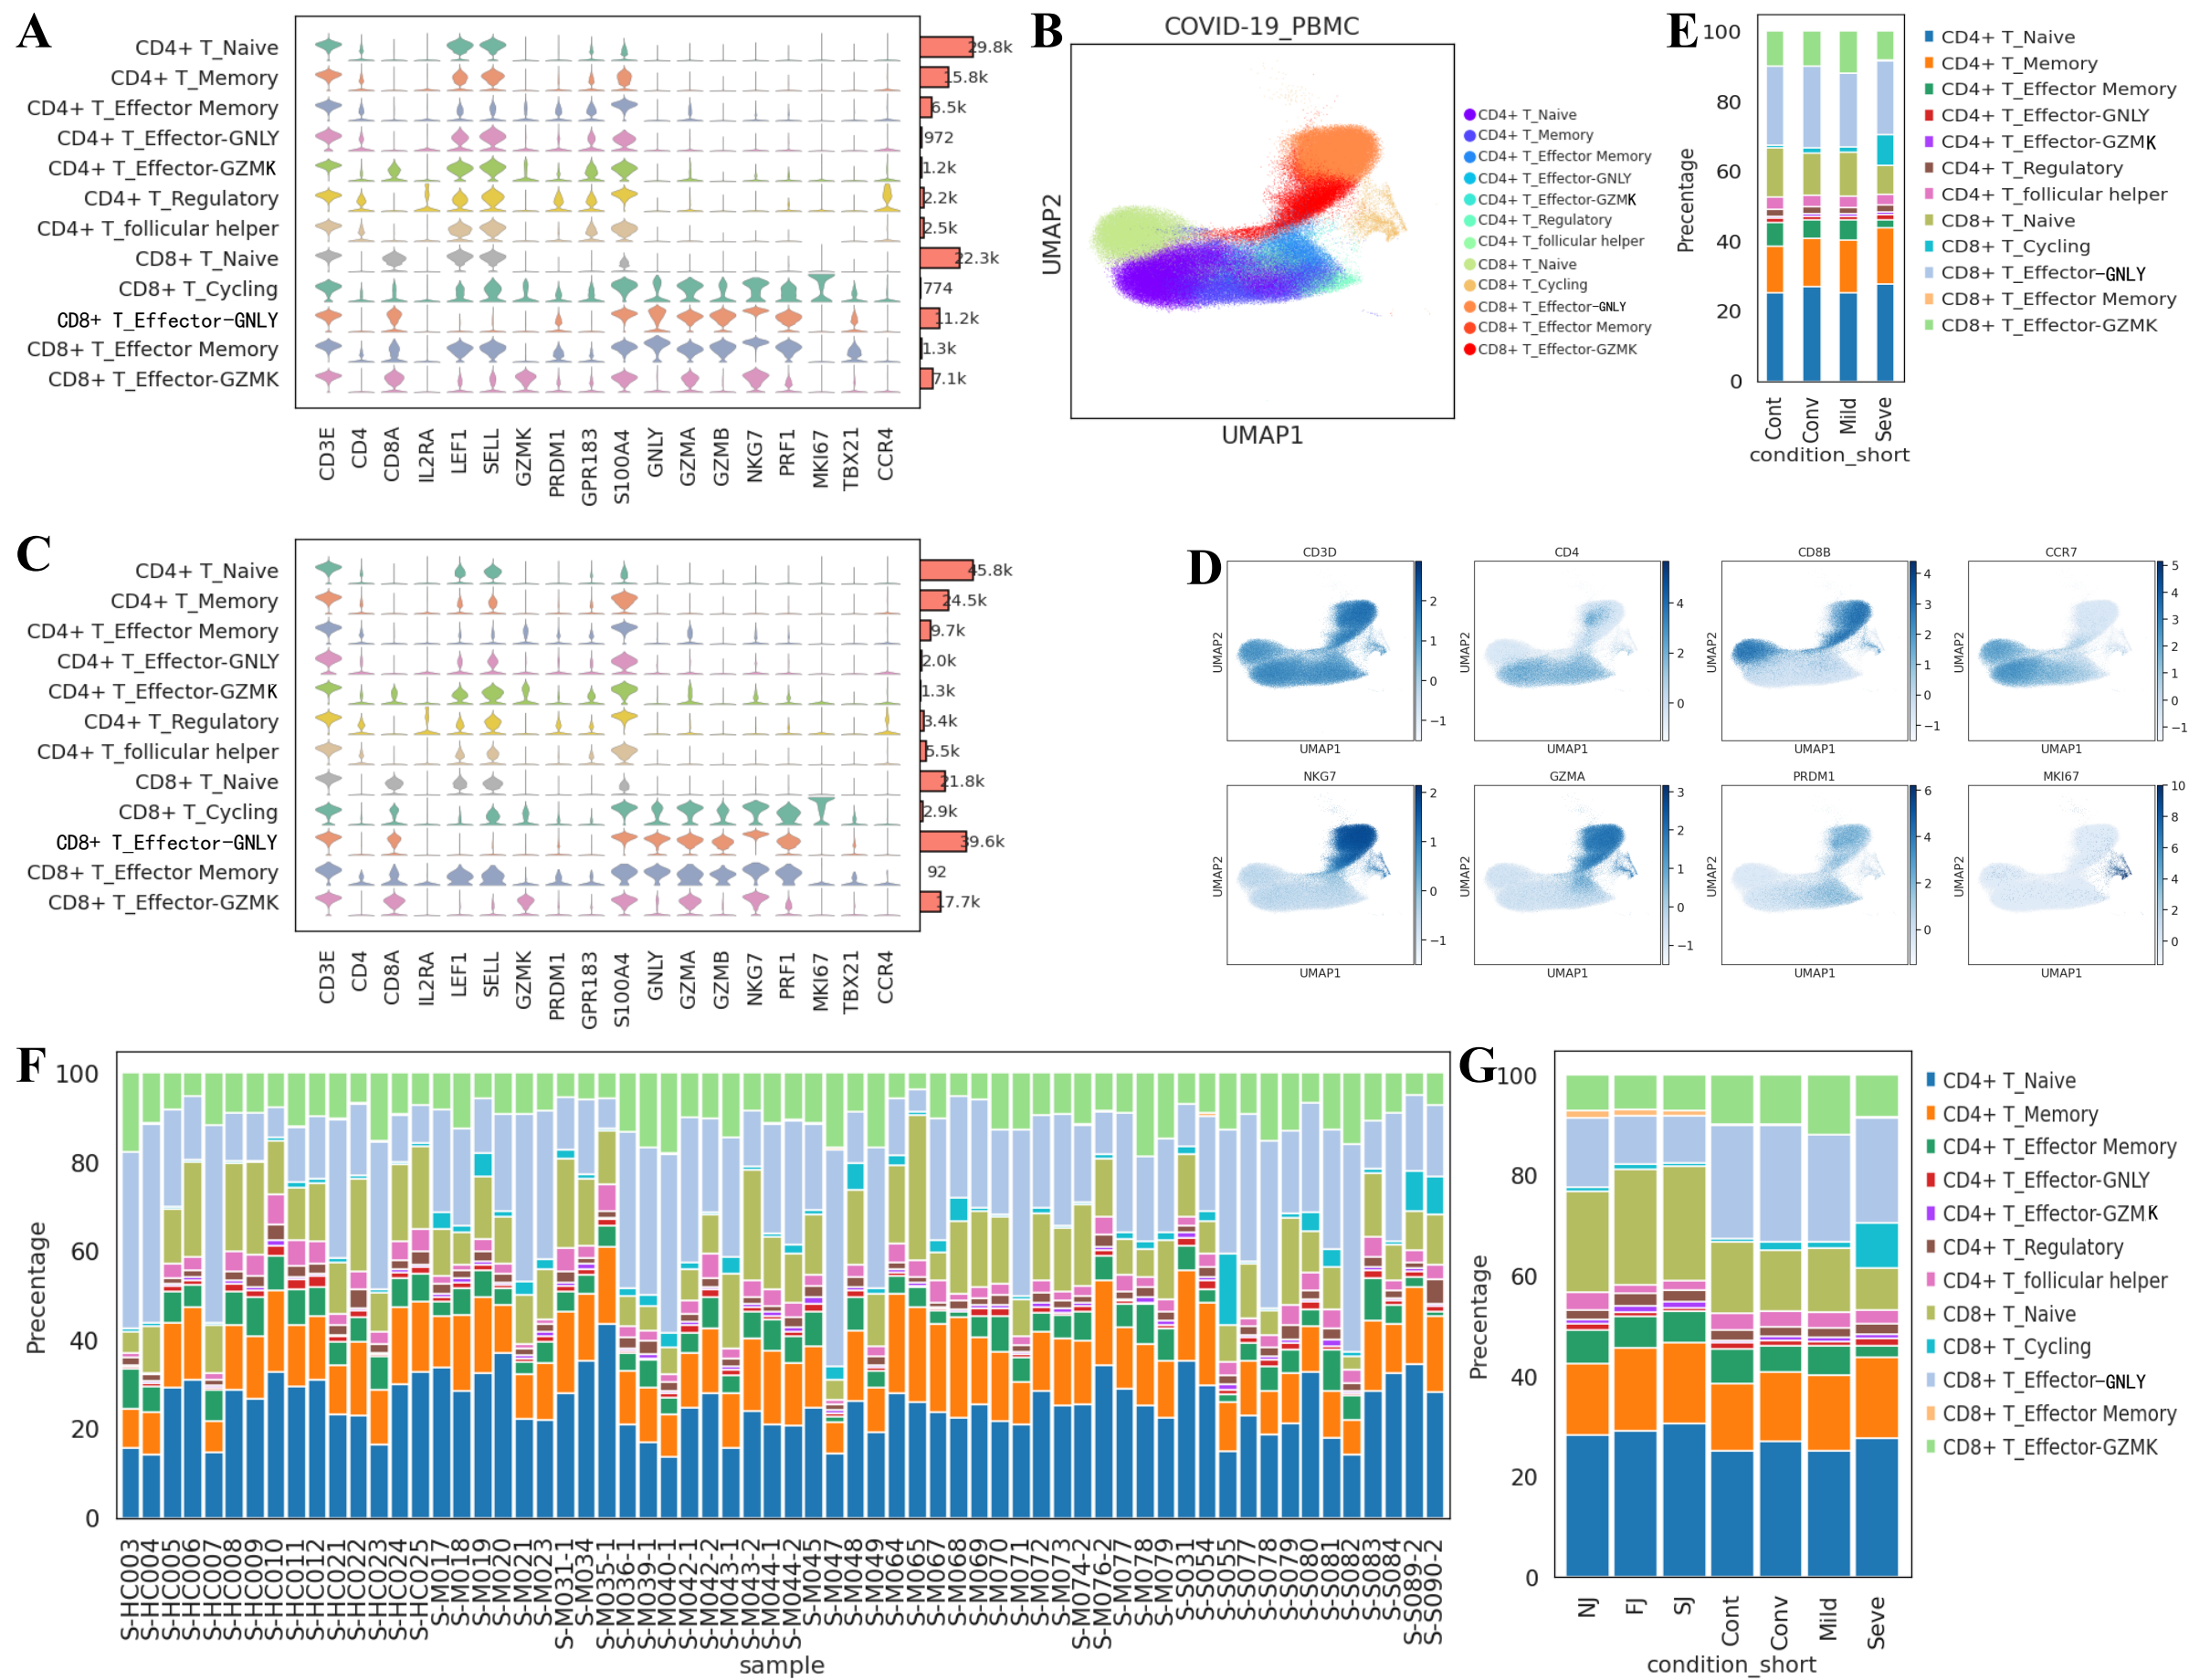

Supplement: JMV-94-5304-s023.pdf [file JMV-94-5304-s023.pdf]
